# Supplementary material for: Comparison of the periodontal condition in Korean and Japanese adults: a cross-sectional study
Source: PubMed Central journal article supplement — BMJ Open. 2018 Dec 2;8(11):bmjopen-2018-024332. doi: 10.1136/bmjopen-2018-024332 (PMC6278802; doi:10.1136/bmjopen-2018-024332), 2018-12-02
Supplement: bmjopen-2018-024332.draft_revisions.pdf [file bmjopen-2018-024332.draft_revisions.pdf]

# BMJ Open

BMJ Open is committed to open peer review. As part of this commitment we make the peer review history of every article we publish publicly available.

When an article is published we post the peer reviewers' comments and the authors' responses online. We also post the versions of the paper that were used during peer review. These are the versions that the peer review comments apply to.

The versions of the paper that follow are the versions that were submitted during the peer review process. They are not the versions of record or the final published versions. They should not be cited or distributed as the published version of this manuscript.

BMJ Open is an open access journal and the full, final, typeset and author-corrected version of record of the manuscript is available on our site with no access controls, subscription charges or pay-per-view fees (<http://bmjopen.bmj.com>).

If you have any questions on BMJ Open's open peer review process please email [editorial.bmjopen@bmj.com](mailto:editorial.bmjopen@bmj.com)

# BMJ Open

## Comparison of the periodontal condition in Korean and Japanese adults

|                               |                                                                                                                                                                                                                                                                                                                                                                                                                                                                                                                                                                                                                                                                                                                                                                                                                                                                                                                                                                                                                                                                                                                                                                                                                                                                                                               |
|-------------------------------|---------------------------------------------------------------------------------------------------------------------------------------------------------------------------------------------------------------------------------------------------------------------------------------------------------------------------------------------------------------------------------------------------------------------------------------------------------------------------------------------------------------------------------------------------------------------------------------------------------------------------------------------------------------------------------------------------------------------------------------------------------------------------------------------------------------------------------------------------------------------------------------------------------------------------------------------------------------------------------------------------------------------------------------------------------------------------------------------------------------------------------------------------------------------------------------------------------------------------------------------------------------------------------------------------------------|
| Journal:                      | <i>BMJ Open</i>                                                                                                                                                                                                                                                                                                                                                                                                                                                                                                                                                                                                                                                                                                                                                                                                                                                                                                                                                                                                                                                                                                                                                                                                                                                                                               |
| Manuscript ID                 | bmjopen-2018-024332                                                                                                                                                                                                                                                                                                                                                                                                                                                                                                                                                                                                                                                                                                                                                                                                                                                                                                                                                                                                                                                                                                                                                                                                                                                                                           |
| Article Type:                 | Research                                                                                                                                                                                                                                                                                                                                                                                                                                                                                                                                                                                                                                                                                                                                                                                                                                                                                                                                                                                                                                                                                                                                                                                                                                                                                                      |
| Date Submitted by the Author: | 22-May-2018                                                                                                                                                                                                                                                                                                                                                                                                                                                                                                                                                                                                                                                                                                                                                                                                                                                                                                                                                                                                                                                                                                                                                                                                                                                                                                   |
| Complete List of Authors:     | <p>Furuta, Michiko; Faculty of Dental Science, Kyushu University, Section of Preventive and Public Health Dentistry, Division of Oral Health, Growth and Development</p> <p>Takeuchi, Kenji; Kyushu University, Section of Preventive and Public Health Dentistry</p> <p>Shimazaki, Yoshihiro ; Aichi-Gakuin University, Department of Preventive Dentistry and Dental Public Health, School of Dentistry</p> <p>Takehita, Toru; Kyushu University, Section of Preventive and Public Health Dentistry; Kyushu University, OBT Research Center</p> <p>Shibata, Yukie; Faculty of Dental Science, Kyushu University, Section of Preventive and Public Health Dentistry, Division of Oral Health, Growth and Development</p> <p>Hata, Jun; Kyushu University, Department of Environmental Medicine, Kyushu University</p> <p>Yoshida, Daigo; Kyushu University, Department of Epidemiology and Public Health, Graduate School of Medical Sciences</p> <p>Park, Deok-Young; College of Dentistry, Gangneung-Wonju National University, Department of Preventive and Public Health Dentistry</p> <p>Ninomiya, Toshiharu; Graduate School of Medical Sciences, Kyushu University, Department of Epidemiology and Public Health</p> <p>Yamashita, Yoshihisa; Kyushu Univ, Preventive and Public Health Dentistry</p> |
| Keywords:                     | EPIDEMIOLOGY, PUBLIC HEALTH, ORAL MEDICINE                                                                                                                                                                                                                                                                                                                                                                                                                                                                                                                                                                                                                                                                                                                                                                                                                                                                                                                                                                                                                                                                                                                                                                                                                                                                    |
|                               |                                                                                                                                                                                                                                                                                                                                                                                                                                                                                                                                                                                                                                                                                                                                                                                                                                                                                                                                                                                                                                                                                                                                                                                                                                                                                                               |

SCHOLARONE™  
Manuscripts

## Comparison of the periodontal condition in Korean and Japanese adults

Michiko Furuta<sup>1</sup>, Kenji Takeuchi<sup>1,2</sup>, Yoshihiro Shimazaki<sup>3</sup>, Toru Takeshita<sup>1,2</sup>, Yukie Shibata<sup>1</sup>,  
Jun Hata<sup>4,5,6</sup>, Daigo Yoshida<sup>4</sup>, Deok-Young Park<sup>7</sup>, Toshiharu Ninomiya<sup>4,5</sup>, Yoshihisa  
Yamashita<sup>1</sup>

<sup>1</sup> Section of Preventive and Public Health Dentistry, Division of Oral Health, Growth and  
Development, Faculty of Dental Science, Kyushu University, Fukuoka, Japan

<sup>2</sup> OBT Research Center, Faculty of Dental Science, Kyushu University, Fukuoka, Japan

<sup>3</sup> Department of Preventive Dentistry and Dental Public Health, School of Dentistry,  
Aichi-Gakuin University

<sup>4</sup> Department of Epidemiology and Public Health, Graduate School of Medical Sciences,  
Kyushu University, Fukuoka, Japan

<sup>5</sup> Center for Cohort Studies, Graduate School of Medical Sciences, Kyushu University,  
Fukuoka, Japan

<sup>6</sup> Department of Medicine and Clinical Science, Graduate School of Medical Sciences,  
Kyushu University, Fukuoka, Japan

<sup>7</sup> Department of Preventive and Public Health Dentistry, College of Dentistry,  
Gangneung-Wonju National University, Gangneung, Korea

1  
2  
3  
4  
5  
6  
7 **Correspondence:** Yoshihisa Yamashita, Section of Preventive and Public Health Dentistry,  
8  
9 Division of Oral Health, Growth and Development, Kyushu University Faculty of Dental  
10  
11 Science, 3-1-1 Maidashi, Higashi-ku, Fukuoka 812-8582, Japan. Fax: 81-92-642-6354;  
12  
13  
14  
15 E-mail: yoshi@dent.kyushu-u.ac.jp  
16  
17  
18  
19

20 **Number of words in the text:** 3189 words  
21  
22

23 **Keywords:** Periodontitis, diabetes mellitus, metabolic syndrome  
24  
25  
26  
27  
28  
29  
30  
31  
32  
33  
34  
35  
36  
37  
38  
39  
40  
41  
42  
43  
44  
45  
46  
47  
48  
49  
50  
51  
52  
53  
54  
55  
56  
57  
58  
59  
60

**Abstract**

**Objectives** The reports of national survey in South Korea and Japan indicated that the prevalence of periodontal disease was lower in Korea than in Japan. However, it has not been described in relation to factors related to periodontal health condition including diabetes and metabolic syndrome. This study compared the periodontal condition in Korean and Japanese adults, with reference to general health status.

**Design** Cross-sectional study

**Setting** National survey in South Korea (Korean National Health and Nutrition Examination Survey "KNHANES") and the population-based studies in Japan (Hisayama study) in 2012

**Participants** This study included 3,574 Korean and 2,205 Japanese adults aged 40-79 years.

**Outcome measures** Periodontal condition was assessed using the Community Periodontal Index (CPI). The examiners in Japan underwent clinical calibration training for periodontal examination with a gold standard examiner from KNHANES, prior to the Hisayama study.

**Results:** Age-adjusted prevalence of periodontal disease defined by CPI score  $\geq 3$  was 31.4% and 42.1% in South Korea and Japan, respectively. Age-adjusted prevalence of diabetes and metabolic syndrome was higher in Korea than in Japan. Logistic regression analysis showed that Japanese participants were more likely to have periodontal disease than Korean participants, after adjusting for age, sex, occupation, oral health status, oral health behavior, diabetes, and metabolic syndrome.

1  
2  
3  
4 **Conclusions:** Higher prevalence of periodontal disease was found in Japanese than in  
5  
6 Koreans, even after adjusting for potential risk factors including diabetes and metabolic  
7  
8 syndrome. These findings suggest that the differences of dental health care system and dietary  
9  
10 intake between two populations may have essential implications for periodontal disease.  
11  
12  
13  
14  
15  
16  
17  
18  
19  
20  
21  
22  
23  
24  
25  
26  
27  
28  
29  
30  
31  
32  
33  
34  
35  
36  
37  
38  
39  
40  
41  
42  
43  
44  
45  
46  
47  
48  
49  
50  
51  
52  
53  
54  
55  
56  
57  
58  
59  
60

## Article Summary

### Strengths and limitations of this study

- This study demonstrates the differences in prevalence of periodontal disease between Koreans and Japanese, after adjustment for systemic condition.
- This study included a large representative population in Korea based on national survey and a community-based population in Japan.
- We performed clinical calibration training for periodontal examination with a gold standard examiner in Korean survey and the examiners in Japanese survey.
- The differences in periodontal conditions between Koreans and Japanese may be affected by unmeasured factors.

## Introduction

According to the World Health Organization (WHO) Global Oral Health Data Bank,<sup>1</sup> the prevalence of periodontal disease, as defined by the Community Periodontal Index (CPI) code  $\geq 3$ , was 4–37% in 35–44 year olds, and 20–52% in 65–74 year olds, in the Asian countries (including the least developed to the highly industrialized) that conducted the national survey. The general health conditions and the health care systems vary widely between the different countries in Asia, depending on the level of economic development. Similarly, oral health conditions and oral health care systems in this region have wide differences.<sup>2</sup> The difference in socioeconomic status might be the cause of inequalities in oral health among Asian countries.

On the other hand, the results of national surveys in Korea and Japan indicate that the prevalence of periodontal disease is lower in Korea (32.9% and 23.9% of individuals aged 19 and over in 2008 and 2010, respectively),<sup>3</sup> than in Japan (44.7% and 41.5% of individuals aged 19 and over in 2005 and 2011, respectively).<sup>4</sup> Among the Asian countries, South Korea (hereafter ‘Korea’) and Japan are closely located, and have similar economic and ethnic backgrounds. The gross domestic product per capita in 2016 was \$27,534 in Korea and \$38,895 in Japan.<sup>5</sup> The Korean and Japanese population belong basically to the northern Mongoloid group, and Koreans are genetically closer to the Japanese than other Mongoloid groups.<sup>6</sup>



1  
2  
3  
4 With regard to health care systems, the governments of both Korea and Japan provide  
5  
6 national health insurance that covers the entire population. In Korea, dental treatment covered  
7  
8 by health insurance is limited, although, in recent years, dental insurance coverage has  
9  
10 expanded, and denture treatment in individuals aged 65 and over (from 2016) and periodontal  
11  
12 scaling (from 2013) are covered.<sup>7</sup> However, in Japan, the health insurance covers almost all  
13  
14 dental treatments, such as treatment for dental caries, including endodontic treatment;  
15  
16 periodontal disease; prosthetic treatment; and extraction. Periodontal treatment has been  
17  
18 covered by health insurance since 1972. The size of the dental workforce is larger in Japan  
19  
20 than in Korea; the population ratio of dentists was 5.0 and 7.4 per 10,000 people in Korea and  
21  
22 Japan, respectively.<sup>8</sup> Additionally, the population ratio of practicing dental hygienists was 4.9  
23  
24 and 8.5 per 10,000 people in Korean and Japan, respectively.<sup>9</sup> It would seem that the Japanese  
25  
26 have a better likelihood of receiving periodontal treatment and preventing periodontal disease  
27  
28 than Koreans, considering the greater dental insurance coverage and the higher number of  
29  
30 dental hygienists. The difference in health care systems between Korean and Japan contradicts  
31  
32 to that in periodontal health condition between two countries.  
33  
34  
35  
36  
37  
38  
39  
40  
41  
42  
43  
44  
45

46 However, great significance cannot be attached to the reports of the national survey,  
47  
48 as the potential risk factors related to periodontal disease are not taken into consideration.  
49  
50 Growing evidence from epidemiological studies indicates that diabetes and metabolic  
51  
52 syndrome are associated with periodontal disease.<sup>10 11</sup> While comparing periodontal disease  
53  
54  
55  
56  
57  
58  
59  
60

1  
2  
3 among different countries, the effect of systemic health on periodontal disease and other risk  
4  
5  
6 factors should be addressed. It is considered that a comparison of geographical and racial  
7  
8  
9 differences in periodontal disease, and interpreting the reasons for these differences, are  
10  
11  
12 essential steps for preventing periodontal disease. The objective of this study was to compare  
13  
14  
15 the periodontal condition of Korean and Japanese adults, in relation to the effects of diabetes  
16  
17  
18 and metabolic syndrome.  
19  
20  
21  
22

## 23 **Methods**

### 24 *Study population*

25  
26  
27 The present study used data for Koreans from a subset of the Fifth Korean National Health  
28  
29 and Nutrition Examination Survey (KNHANES), a nationwide cross-sectional survey  
30  
31  
32 conducted in 2012 by the Korea Center for Disease Control and Prevention. Participants were  
33  
34  
35 selected using a multi-stage clustered probability design to produce a nationally representative  
36  
37  
38 non-institutionalized civilian sample. All participants provided written informed consent.  
39  
40  
41  
42 Additional information about the KNHANES can be found elsewhere.<sup>12</sup> This study included  
43  
44  
45 3,955 participants from the 2012 survey, aged 40–79 years, who received medical and dental  
46  
47  
48 examinations in addition to a health interview. After excluding participants with missing data,  
49  
50  
51 3,574 participants were included in the analysis.  
52  
53

54 Data for Japanese was obtained from the Hisayama study, a population-based  
55  
56  
57  
58  
59  
60

1  
2  
3  
4 prospective study of cerebro-cardiovascular diseases, in the town of Hisayama, which is a  
5  
6 suburban rural area of Fukuoka city in southern Japan. The age and occupational distributions  
7  
8 of the population of this town are similar to those of Japan as a whole.<sup>13</sup> As part of the  
9  
10 Hisayama study, dental examinations were conducted for residents aged 40 and over, in 2012.  
11  
12  
13  
14 This study included 2,342 participants, aged 40–79 years who received both medical and  
15  
16 dental examinations in 2012 (57.8% of the total population in this age group). Written  
17  
18 informed consent was obtained from all participants. After excluding the participants with  
19  
20 missing data, 2,205 participants were analyzed in this study.  
21  
22  
23  
24  
25

26 The study was approved by the Kyushu University Institutional Review Board for  
27  
28 Clinical Research (24-129).  
29  
30  
31  
32  
33

### 34 *Assessment of periodontal condition and dental caries*

35  
36  
37 Periodontal condition was assessed using the CPI in the KNHANES and Hisayama studies.  
38  
39  
40 As per World Health Organization protocols, ten teeth were selected for the periodontal  
41  
42 examination: two molars in each posterior sextant, and the upper right and lower left central  
43  
44 incisors. If no index tooth was present in a qualified sextant, all the remaining teeth in that  
45  
46 sextant were examined. The highest code among the examined sextants was recorded, to  
47  
48 represent the CPI status for each individual. Periodontal disease was defined as CPI code  $\geq 3$   
49  
50  
51  
52  
53  
54 (periodontal pocket depth  $\geq 4$  mm).  
55  
56  
57  
58  
59  
60

1  
2  
3  
4 Trained and calibrated dentists assessed the periodontal conditions in the KNHANES  
5  
6 and Hisayama studies. To ensure reliability of measurements using CPI, seven examiners in  
7  
8 the Hisayama study were calibrated to a gold standard examiner in 2012 KNHANES. The  
9  
10 calibration was performed by conducting examinations on ten Japanese volunteers who had  
11  
12 all six sextants examined. The mean  $\kappa$  value (range) between examiners in Hisayama study  
13  
14 and the gold standard examiner in 2012 KNHANES was 0.55 (0.43–0.66) for CPI code.  
15  
16  
17  
18  
19

20 The total number of decayed and filled teeth was used as a measure of assessing  
21  
22 dental caries. Teeth which had undergone permanent restoration (because of previous decay or  
23  
24 other reasons) with a fixed dental prosthesis abutment, were regarded as filled teeth.  
25  
26  
27  
28  
29  
30

### 31 *Assessment of diabetes and metabolic syndrome*

32  
33  
34 A blood sample was collected from the antecubital vein in the morning, after fasting for at  
35  
36 least 8 hours in KNHANES, and after overnight fasting in the Hisayama study. Fasting  
37  
38 plasma concentrations of glucose, triglycerides, and high-density lipoprotein (HDL)  
39  
40 cholesterol were measured. Revised HDL values were used in KNHANES, because HDL  
41  
42 values in the same sample were different between the Korean Central Laboratory and the  
43  
44 Centers for Disease Control and Prevention (CDC) in US; conversion rates were calculated by  
45  
46 analyzing serum samples sent to the CDC, using isotope-dilution gas chromatography-mass  
47  
48 spectrometry, which is considered the gold standard method.<sup>14</sup> Diabetes was defined as fasting  
49  
50  
51  
52  
53  
54  
55  
56  
57  
58  
59  
60

1  
2  
3 glucose  $\geq 126$  mg/dl, or undergoing treatment for diabetes with medication and/or insulin  
4  
5  
6 injections.<sup>15</sup> For the 2012 KNHANES group, hemoglobin A1c was only assessed for  
7  
8  
9 individuals with diabetes or hyperglycemia (fasting glucose  $\geq 126$  mg/dl), and the oral glucose  
10  
11  
12 tolerance test was not conducted; therefore, the diagnostic criteria of diabetes used in this  
13  
14  
15 study did not correspond with the current diagnostic criteria proposed by the American  
16  
17  
18 Diabetes Association. Metabolic syndrome (MetS) was defined based on a Joint Interim  
19  
20  
21 Statement, using the criteria for Asians:<sup>16</sup> elevated waist circumference ( $\geq 90$  cm in men and  
22  
23  
24  $\geq 80$  cm in women), elevated fasting glucose levels ( $\geq 100$  mg/dl or drug treatment for elevated  
25  
26  
27 glucose), elevated triglycerides ( $\geq 150$  mg/dl or drug treatment for elevated triglycerides),  
28  
29  
30 reduced HDL ( $< 40$  mg/dl in men and  $< 50$  mg/dl in women), and elevated blood pressure  
31  
32  
33 (systolic blood pressure  $\geq 130$  mmHg or diastolic blood pressure  $\geq 85$  mmHg, or  
34  
35  
36 antihypertensive drug treatment). Individuals who were positive for three or more of these  
37  
38  
39  
40  
41  
42  
43  
44  
45  
46  
47  
48  
49  
50  
51  
52  
53  
54  
55  
56  
57  
58  
59  
60 components were considered to have MetS.

### ***Measurement of other factors***

46 Information about participants' smoking habits, occupational status, and dental visits in the  
47  
48  
49 last 12 months, was obtained from a health interview in KNHANES, and a self-administered  
50  
51  
52  
53  
54  
55  
56  
57  
58  
59  
60 questionnaire in the Hisayama study. Smokers were classified as current, never, or former  
smokers. Occupational status was divided into four categories: clerical support workers;

1  
2  
3 elementary occupations and unskilled workers; other jobs; and homemaker, unemployed or  
4  
5  
6 retired.  
7  
8  
9

### 10 11 12 *Statistical Analysis*

13  
14  
15 The t test or chi-square test was used to assess the differences in distribution of age, sex, and  
16  
17 job classification between the KNHANES and Hisayama studies. Age-adjusted mean values  
18  
19 of the number of present teeth, decayed teeth, and filled teeth, taken as continuous variables,  
20  
21 were estimated using analysis of covariance. The proportion of periodontal disease, diabetes,  
22  
23 MetS, number of teeth, and oral health behaviors, taken as categorical variables, were  
24  
25  
26 adjusted for age distribution of the WHO standard population in 2000–2025, by the direct  
27  
28  
29 method. Differences in the mean values and proportions between countries were tested using  
30  
31  
32 the linear regression model and logistic regression analysis, respectively. The association  
33  
34  
35 between periodontal disease (dependent variable) and country (independent variable) was  
36  
37  
38 assessed using logistic regression analysis. The association between number of teeth  
39  
40  
41 (dependent variable) and country (independent variable) was investigated using generalized  
42  
43  
44 linear models with a Poisson probability distribution. Logistic regression models and  
45  
46  
47 generalized linear models were tested: 1) model including diabetes, 2) model including MetS,  
48  
49  
50 and 3) model including individual MetS components. Standard errors were estimated using  
51  
52  
53  
54 robust or sandwich variance estimators of the covariance matrix of the regression coefficients,  
55  
56  
57  
58  
59  
60

1  
2  
3 to correct for heteroskedasticity across countries. Odds ratio (OR),  $\beta$  coefficients, and 95%  
4  
5  
6 confidence interval (CI) derived from corrected standard errors were calculated. The impact  
7  
8  
9 of an unmeasured confounder on the estimated OR was examined in sensitivity analyses,  
10  
11  
12 based on Lin et al.<sup>17</sup> SPSS software (version 19.0 for Windows; IBM SPSS Japan, Tokyo,  
13  
14  
15 Japan) and R version 3.2.1 was used for data analyses.  $P < 0.05$  was considered statistically  
16  
17  
18 significant in all analyses.  
19  
20  
21  
22

## 23 **Results**

24  
25  
26 Demographic characteristics of the study participants in Korea and Japan are shown in Table 1.  
27  
28  
29 Participants in Korea were significantly younger than those in Japan. Using age adjusted  
30  
31  
32 means, and the frequencies of dental and systemic parameters, it was observed that the  
33  
34  
35 percentage of participants with periodontal disease, and the mean number of present and filled  
36  
37  
38 teeth, were significantly higher in Japan than in Korea (Table 2). The percentage of  
39  
40  
41 participants with diabetes and MetS was significantly higher in Korea than in Japan. In terms  
42  
43  
44 of individual MetS components, participants in Japan had a higher prevalence of elevated  
45  
46  
47 fasting glucose and blood pressure, and a lower prevalence of elevated triglycerides and  
48  
49  
50 reduced HDL, than those in Korea.

51  
52 Logistic regression analyses showed that the Japanese were more likely to have  
53  
54  
55 periodontal disease than Koreans (OR = 1.68, 95% CI: 1.41–2.00), even when diabetes, and  
56  
57  
58  
59  
60

1  
2  
3 covariates including age, sex, number of teeth, number of decayed and filled teeth, dental  
4  
5  
6 visits, smoking, and occupation were included in the model (Table 3). Similar results were  
7  
8  
9 observed in the models including MetS and individual MetS component.  
10

## 11 12 13 14 15 **Discussion**

16  
17 This study showed that periodontal disease was more prevalent in the Japanese compared to  
18  
19  
20 Koreans, even after adjustment for diabetes and MetS. Our results suggest that this difference  
21  
22  
23 in prevalence was not related to the participants' systemic condition. The strength of our study  
24  
25  
26 lies in the fact that the examiners in Japan received calibration for periodontal examination by  
27  
28  
29 a gold standard examiner in KNHANES, which helped reduce bias in the prevalence  
30  
31  
32 estimates.  
33

34  
35 With regards to the results of the logistic regression models, the proportion of the  
36  
37 variance explained by the model adjusted for diabetes and covariates was relatively low  
38  
39  
40 (Nagelkerke's R-squared 13.6%). This suggests that unmeasured factors might be associated  
41  
42  
43 with the differences in periodontal condition between the Koreans and Japanese. In post hoc  
44  
45  
46 sensitivity analyses, the association between country and periodontal disease was not  
47  
48  
49 significant in the logistic model, only when there was a significant difference in the  
50  
51  
52 proportions of an unmeasured factor between the Koreans and Japanese (Supplementary Table  
53  
54  
55 1). In this model, periodontal disease could possibly be explained in relation to unmeasured  
56  
57  
58  
59  
60



1  
2  
3 factors than to country, which suggests that unmeasured factors strongly contribute to the  
4  
5  
6 differences in periodontal condition.  
7

8  
9 Several factors such as oral microbiota and dietary intake could be considered as  
10  
11 unmeasured factors which probably influenced our findings. We have previously shown  
12  
13 higher proportions of *Prevotella* and *Veillonella*, and lower proportions of *Neisseria* and  
14  
15 *Haemophilus*, in the salivary microbiome of Japanese from the Hisayama study, compared to  
16  
17 Koreans from the Yangpyeong cohort study undertaken in Yangpyeong County, a suburb of  
18  
19 the Seoul metropolitan area.<sup>18</sup> Similar to our present study, the previous study showed that the  
20  
21 periodontal condition of the Japanese was worse than the Koreans in the Yangpyeong cohort  
22  
23 study, by measuring the periodontal pocket depth and clinical attachment level on the  
24  
25 mesio-buccal and mid-buccal sites, for specific 12 index teeth;<sup>18</sup> the study indicated that the  
26  
27 greater proportion of dysbiotic oral microbiota in the Japanese is associated with a worse  
28  
29 periodontal condition, compared to Koreans. Thus, the difference in periodontal condition  
30  
31 between the Koreans and the Japanese may be associated with the disparity in their oral  
32  
33 microbiota. It is difficult to determine the exact cause of the differences in microbiomes  
34  
35 between Koreans and Japanese. The fact that the Japanese in our previous study had a greater  
36  
37 proportion of dysbiotic oral microbiota, taken together with the fact that diabetes and MetS  
38  
39 were less prevalent in the Japanese compared to Koreans, suggests that systemic disease is  
40  
41 less likely to be related to the differences in microbiomes. Alternatively, nutrition and dietary  
42  
43  
44  
45  
46  
47  
48  
49  
50  
51  
52  
53  
54  
55  
56  
57  
58  
59  
60

1  
2  
3 intake might affect periodontal disease, by affecting the oral bacterial species. Both Korea and  
4  
5  
6 Japan are based on an agrarian society and their dietary patterns are similar,<sup>19</sup> however,  
7  
8  
9 Koreans prefer their food spicier or saltier compared to the Japanese.<sup>20</sup> Kimchi, a lactic acid  
10  
11  
12 fermented vegetable product, is a well-known traditional Korean food. Koreans consume 96.3  
13  
14  
15 g/day of kimchi according to the KNHANES of 2015.<sup>21</sup> On the other hand, the Japanese  
16  
17  
18 consume 3.6 g/day of pickled vegetables, such as pickled Chinese cabbage and kimchi, based  
19  
20  
21 on the Japanese National Health and Nutrition Survey of 2014.<sup>22</sup> Kimchi contains high levels  
22  
23  
24 of vitamins, minerals, dietary fibers, and other functional components, and has been reported  
25  
26  
27 to have anticancer, antioxidative, and antiatherosclerotic effects, and probiotic properties.<sup>23</sup>  
28  
29 Lactobacilli are responsible for kimchi fermentation. It has been shown that probiotic  
30  
31  
32 lactobacilli affect the oral ecology by specifically preventing the adherence of other oral  
33  
34  
35 bacteria, and by modifying the protein composition of the salivary pellicle.<sup>24</sup> Thus, the high  
36  
37  
38 intake of kimchi in Koreans may be associated with a better oral environment, and a lower  
39  
40  
41 prevalence of periodontal disease than in Japanese.  
42

43 In this study, the Japanese had greater number of teeth than the Koreans. Generalized  
44  
45  
46 linear models showed that the Japanese had a greater number of teeth ( $\beta$  coefficient = 0.19;  
47  
48  
49 95% CI: 0.17, 0.21) than Koreans, after adjusting for diabetes and covariates (Supplementary  
50  
51  
52 Table 2). It is conceivable that the prevalence of periodontal disease was higher in Japan than  
53  
54  
55 in Korea, because of the greater number of teeth (in negative aspect, teeth with periodontal  
56  
57  
58  
59  
60

1  
2  
3  
4 disease were not extracted, and remained). Logistic regression models showed that Japanese  
5  
6  
7 were more likely to have periodontal disease than Koreans, after adjusting for number of teeth.  
8  
9  
10 Additionally, when we conducted a separate analysis according to the number of teeth (10-19  
11  
12 teeth, 20-27 teeth, and 28 and more teeth), the association between country and periodontal  
13  
14  
15 disease was consistently significant (Supplementary Table 3). The difference in periodontal  
16  
17  
18 conditions between the Koreans and Japanese is significant, regardless of number of teeth.  
19

20  
21 The difference in the number of teeth between the Koreans and Japanese may be  
22  
23 related to the extent of health insurance coverage. Although both Korea and Japan have  
24  
25  
26 universal health insurance systems, the cost of dental care is lower in Japan compared to that  
27  
28  
29 in Korea. Japanese health insurance covers almost all basic dental treatments such as  
30  
31  
32 endodontic, periodontal, and prosthetic treatments including bridge and removable dentures.  
33  
34  
35 The cost of dental treatment in Japan is about \$24 (with exchange rate of 100 yen per dollar)  
36  
37  
38 for resin filling in single cavity, \$60 for infected root canal treatment in molar with three root  
39  
40  
41 canals, \$140 for gold/silver palladium crown with metal post and core, \$26 for molar  
42  
43  
44 extractions. Japanese people who receive dental treatment pay only 10–30% of the total cost  
45  
46  
47 of treatment depending on age and income, in the universal health insurance system. In Korea,  
48  
49  
50 universal health insurance covers some treatments such as endodontic, periodontal, denture  
51  
52  
53 treatment, and extraction in individuals of specific age groups. Resin filling, and prosthetic  
54  
55  
56 treatment including crown and bridge, are not covered. The cost of dental treatment in Korea  
57  
58  
59  
60

1  
2  
3  
4 is about \$100 (with exchange rate of 1000 won per dollar) for resin filling in single cavity,  
5  
6 \$150 for infected root canal treatment in molar with three root canals, \$450 for gold/silver  
7  
8 palladium crown with metal post and core, \$28 for molar extractions. Korean people who  
9  
10 receive infected root canal treatment and extraction, pay 30% of the total cost of treatment in  
11  
12 the universal health insurance system. This indicates that the Japanese are more likely to  
13  
14 receive restorative and prosthetic treatment compared to Koreans, due to the lower cost of  
15  
16 dental care. Indeed, the number of filled teeth (including permanent restoration by fixed  
17  
18 dental prosthesis abutment) was higher in Japan than in Korea in this study (Table 2).  
19  
20 Additionally, the Japanese reported more dental visits in the last 12 months, compared to  
21  
22 Koreans (Table 2). The greater number of teeth in the Japanese may be attributable to the low  
23  
24 economic barriers to obtaining dental care in Japan.  
25  
26  
27  
28  
29  
30  
31  
32  
33

34  
35 Our study has some limitations. First, the Japanese data were derived from one town  
36  
37 in Japan, whereas Korean data were based on a national survey. The study cohort in Japan,  
38  
39 which comprised residents in Hisayama town, is recognized to be demographically  
40  
41 representative of Japan, according to the national census.<sup>13</sup> The differences in periodontal  
42  
43 conditions observed in this study were consistent with the reports of a national survey.  
44  
45  
46 Therefore, using the study cohort in Japan to generalize our findings might be acceptable.  
47  
48  
49  
50  
51 Second, our findings regarding the differences in periodontal conditions between Koreans and  
52  
53 Japanese may be affected by unmeasured factors including oral microbiota and dietary intake.  
54  
55  
56  
57  
58  
59  
60

1  
2  
3  
4 Our previous study compared the oral microbiota between Koreans and Japanese;<sup>18</sup> however,  
5  
6 participants in Korea were drawn from a convenience sample, and not a nationally  
7  
8 representative sample. Future studies are needed to compare oral microbiota and the dietary  
9  
10 intake between Koreans and Japanese using data from a nationally representative sample to  
11  
12 explore the causes of the difference in periodontal condition. Third, a partial mouth  
13  
14 assessment for periodontal condition was used. Although CPI is an easier way to evaluate  
15  
16 periodontal condition in the community setting, this method may inherently underestimate or  
17  
18 overestimate the prevalence and severity of periodontal parameters due to the use of  
19  
20 representative teeth and pseudo pockets.<sup>25</sup>  
21  
22  
23  
24  
25  
26  
27  
28

29         Despite these limitations, this study revealed interesting findings, and has several  
30  
31 implications. The prevalence of periodontal disease was lower in Koreans than in Japanese,  
32  
33 while the prevalence of diabetes and MetS were higher in Koreans than in Japanese. These  
34  
35 findings suggest that the systemic condition is not associated with the difference in  
36  
37 periodontal condition between Koreans and Japanese. We need more studies which can  
38  
39 identify other factors that may underlie the observed differences in periodontal condition  
40  
41 between countries.  
42  
43  
44  
45  
46  
47  
48  
49  
50

51 **Author contributions** MF, YS, D-YP, and YY conceived and planned the project. MF, YS,  
52  
53 TT, JH, DY, D-YP, and TN were responsible for acquisition of data. MF, KT, and TT  
54  
55  
56  
57  
58  
59  
60

1  
2  
3  
4 conducted statistical analysis. MF, KT, and YY wrote the manuscript.  
5

6 **Funding** This work was supported by JSPS KAKENHI Grant Number 16H05850 from the  
7  
8  
9 Ministry of Education, Science, Sports, and Culture of Japan, Tokyo, Japan.  
10

11 **Competing interests** None declared.  
12  
13

14 **Patient consent** Not required in Korean National Health and Nutrition Examination Survey.  
15  
16  
17 Obtained in Hisayama study.  
18

19 **Ethics approval** This study was approved by the Kyushu University Institutional Review  
20  
21  
22 Board for Clinical Research (24-129).  
23  
24

25 **Provenance and peer review** Not commissioned; externally peer reviewed.  
26  
27

28 **Data sharing statement** The original data of Koreans came from Korean National Health and  
29  
30  
31 Nutrition Examination Survey (<https://knhanes.cdc.go.kr/knhanes/eng/index.do>). No  
32  
33  
34 additional data are available in Hisayama study.  
35

36 **Open Access** This is an Open Access article distributed in accordance with the Creative  
37  
38  
39 Commons Attribution Non Commercial (CC BY-NC 4.0) license, which permits others to  
40  
41  
42 distribute, remix, adapt, build upon this work non-commercially, and license their derivative  
43  
44  
45 works on different terms, provided the original work is properly cited and the use is  
46  
47  
48 non-commercial. See: <http://creativecommons.org/licenses/by-nc/4.0/>  
49  
50  
51  
52  
53  
54  
55  
56  
57  
58  
59  
60

## References

1. World Health Organization. An overview of CPITN data in the WHO Global Oral Data Bank 2017 [cited 2017, December 23. Available from: <http://www.dent.niigata-u.ac.jp/prevent/perio/contents.html> accessed August 2 2017.
2. Corbet EF, Zee KY, Lo EC. Periodontal diseases in Asia and Oceania. *Periodontol 2000* 2002;29:122-52.
3. Korea Centers for Disease Control and Prevention. Korean national health and examination surveys 2018 [cited 2018, March 8. Available from: <http://cdc.go.kr/CDC/intro.html> accessed August 4 2017.
4. Japanese Ministry of Health Labour and Welfare. Survey of Dental Diseases 2017 [cited 2017, November 1. Available from: <http://www.mhlw.go.jp/toukei/list/62-17.html> accessed August 4 2017.
5. The World Bank. World bank data 2017 [cited n.d. Available from: <http://data.worldbank.org/> accessed August 4 2017.
6. Abdulla MA, Ahmed I, Assawamakin A, et al. Mapping human genetic diversity in Asia. *Science* 2009;326:1541-5.
7. Lee JH, Lee JS, Choi JK, et al. National dental policies and socio-demographic factors affecting changes in the incidence of periodontal treatments in Korean: A nationwide population-based retrospective cohort study from 2002-2013. *BMC oral health* 2016;16:118.

- 1  
2  
3  
4 8. World Health Organization. World Health Statistics 2012 2012 [cited n.d. Available from:  
5  
6 [http://www.who.int/gho/publications/world\\_health\\_statistics/2012/en/](http://www.who.int/gho/publications/world_health_statistics/2012/en/) accessed  
7  
8  
9 August 4 2017.  
10
- 11  
12 9. International Federation of Dental Hygienists. Working abroad as a Dental Hygienist 2018  
13  
14 [cited 2018, February 10. Available from: [http://www.ifdh.org/work\\_abroad.html](http://www.ifdh.org/work_abroad.html)  
15  
16  
17 accessed August 4 2017.  
18
- 19  
20 10. Lamster IB, Pagan M. Periodontal disease and the metabolic syndrome. *Int Dent J*  
21  
22 2017;67:67-77.  
23
- 24  
25 11. Levine RS. Obesity, diabetes and periodontitis--a triangular relationship? *Br Dent J*  
26  
27 2013;215:35-9.  
28
- 29  
30 12. Kweon S, Kim Y, Jang MJ, et al. Data resource profile: the Korea National Health and  
31  
32 Nutrition Examination Survey (KNHANES). *Int J Epidemiol* 2014;43:69-77.  
33  
34
- 35  
36 13. Hata J, Ninomiya T, Hiraoka Y, et al. Secular trends in cardiovascular disease and its risk  
37  
38 factors in Japanese: half-century data from the Hisayama Study (1961-2009).  
39  
40  
41 *Circulation* 2013;128:1198-205.  
42  
43
- 44  
45 14. Moon JH, Koo BK, Moon MK. Optimal high-density lipoprotein cholesterol cutoff for  
46  
47 predicting cardiovascular disease: Comparison of the Korean and US National Health  
48  
49 and Nutrition Examination Surveys. *Journal of clinical lipidology* 2015;9:334-42.  
50  
51
- 52  
53 15. American Diabetes Association. Standards of medical care in diabetes--2014. *Diabetes*  
54  
55  
56  
57  
58  
59



- 1  
2  
3  
4           *Care* 2014;37 Suppl 1:S14-80.  
5  
6  
7 16. Alberti KG, Eckel RH, Grundy SM, et al. Harmonizing the metabolic syndrome: a joint  
8  
9           interim statement of the International Diabetes Federation Task Force on  
10  
11           Epidemiology and Prevention; National Heart, Lung, and Blood Institute; American  
12  
13           Heart Association; World Heart Federation; International Atherosclerosis Society; and  
14  
15           International Association for the Study of Obesity. *Circulation* 2009;120:1640-5.  
16  
17  
18  
19  
20 17. Lin DY, Psaty BM, Kronmal RA. Assessing the sensitivity of regression results to  
21  
22           unmeasured confounders in observational studies. *Biometrics* 1998;54:948-63.  
23  
24  
25  
26 18. Takeshita T, Matsuo K, Furuta M, et al. Distinct composition of the oral indigenous  
27  
28           microbiota in South Korean and Japanese adults. *Scientific reports* 2014;4:6990.  
29  
30  
31  
32 19. Lee SI, Moon HY, Kwak JM, et al. Relationship between meat and cereal consumption  
33  
34           and colorectal cancer in Korea and Japan. *J Gastroenterol Hepatol* 2008;23:138-40.  
35  
36  
37  
38 20. Lee WC, Lee MJ, Kim JS, et al. Foodborne illness outbreaks in Korea and Japan studied  
39  
40           retrospectively. *J Food Prot* 2001;64:899-902.  
41  
42  
43  
44 21. Park J, Lee H-J. Shifts in Kimchi Consumption between 2005 and 2015 by Region and  
45  
46           Income Level in the Korean Population: Korea National Health and Nutrition  
47  
48           Examination Survey (2005, 2015). *Korean Journal of Community Nutrition*  
49  
50           2017;22:145-58.  
51  
52  
53  
54 22. Japanese Ministry of Health Labour and Welfare. National Health and Nutrition Survey  
55  
56  
57  
58  
59  
60

2018 [cited 2018, February 1. Available from:

[http://www.mhlw.go.jp/bunya/kenkou/kenkou\\_eiyou\\_chousa.html](http://www.mhlw.go.jp/bunya/kenkou/kenkou_eiyou_chousa.html) accessed August 31

2017.

23. Park KY, Jeong JK, Lee YE, et al. Health benefits of kimchi (Korean fermented vegetables) as a probiotic food. *Journal of medicinal food* 2014;17:6-20.
24. Stamatova I, Meurman JH. Probiotics and periodontal disease. *Periodontol 2000* 2009;51:141-51.
25. Kingman A, Albandar JM. Methodological aspects of epidemiological studies of periodontal diseases. *Periodontol 2000* 2002;29:11-30.

Table 1. Demographic characteristics of Korean and Japanese participants aged 40–79 years

|                                                 | Korean<br>n=3574 | Japanese<br>n=2205 | P value |
|-------------------------------------------------|------------------|--------------------|---------|
| Age                                             | 58.4±11.0        | 60.5±10.7          | <0.001  |
| Age category                                    |                  |                    | <0.001  |
| 40-49                                           | 902 (25.2%)      | 434 (19.7%)        |         |
| 50-59                                           | 1009 (28.2%)     | 514 (23.3%)        |         |
| 60-69                                           | 936 (26.2%)      | 743 (33.7%)        |         |
| 70-79                                           | 727 (20.3%)      | 514 (23.3%)        |         |
| Gender                                          |                  |                    | 0.074   |
| Men                                             | 1527 (42.7%)     | 995 (45.1%)        |         |
| Women                                           | 2047 (57.3%)     | 1210 (54.9%)       |         |
| Job classification                              |                  |                    | <0.001  |
| Clerical support workers                        | 191 (5.3%)       | 526 (23.9%)        |         |
| Elementary occupations                          | 394 (11.0%)      | 128 (5.8%)         |         |
| Other jobs                                      | 1514 (42.4%)     | 389 (17.6%)        |         |
| Unemployed, homemakers and<br>part-time workers | 1475 (41.3%)     | 1162 (52.7%)       |         |

n (%), mean ± SD

 $\chi^2$  test for categorical variable and t test for continuous variable

Table 2. Age-adjusted mean value and frequency of dental and systemic parameters by country

|                                           | Korean          | Japanese        | P value |
|-------------------------------------------|-----------------|-----------------|---------|
| Periodontal disease (CPI code $\geq 3$ )* | 31.4%           | 42.1%           | <0.001  |
| Number of teeth                           | 22.9 $\pm$ 0.1  | 24.1 $\pm$ 0.1  | <0.001  |
| 0                                         | 2.0%            | 1.0%            |         |
| 1-9                                       | 4.6%            | 2.6%            |         |
| 10-19                                     | 8.5%            | 7.6%            |         |
| 20-27                                     | 39.9%           | 45.8%           |         |
| 28-                                       | 45.0%           | 42.9%           |         |
| Number of decayed teeth                   | 0.59 $\pm$ 0.02 | 0.59 $\pm$ 0.03 | 0.882   |
| Number of filled teeth                    | 7.0 $\pm$ 0.1   | 13.0 $\pm$ 0.2  | <0.001  |
| Dental visit in the last 12 months        | 25.6%           | 30.4%           | <0.001  |
| Current smoking                           | 18.6%           | 20.1%           | 0.485   |
| Diabetes                                  | 11.9%           | 9.4%            | 0.018   |
| Elevated waist circumference              | 38.6%           | 39.2%           | 0.793   |
| Elevated fasting glucose                  | 36.2%           | 50.3%           | <0.001  |
| Elevated blood pressure                   | 46.7%           | 47.6%           | 0.046   |
| Elevated triglycerides                    | 39.8%           | 32.1%           | 0.001   |
| Reduced HDL                               | 39.8%           | 8.6%            | <0.001  |
| MetS                                      | 36.2%           | 30.5%           | 0.001   |

Mean  $\pm$  SD

Differences in age-adjusted mean values and proportions were tested by linear regression model and logistic regression analysis

\* Participants who received periodontal examination and had more than 10 teeth (n = 3,217 in Korean and n = 2,067 in Japanese).

HDL, high density lipoprotein; MetS, metabolic syndrome

Table 3. Adjusted odds ratio for periodontal disease according to country.

|                            | Model 1 |             |         | Model 2 |             |         | Model 3 |             |         |
|----------------------------|---------|-------------|---------|---------|-------------|---------|---------|-------------|---------|
|                            | OR      | (95% CI)    | P value | OR      | (95% CI)    | P value | OR      | (95% CI)    | P value |
| Country                    |         |             |         |         |             |         |         |             |         |
| Korea                      | 1       |             |         | 1       |             |         | 1       |             |         |
| Japan                      | 1.68    | (1.41-2.00) | <0.001  | 1.67    | (1.41-1.99) | <0.001  | 1.80    | (1.50-2.16) | <0.001  |
| Diabetes                   |         |             |         |         |             |         |         |             |         |
| No                         | 1       |             |         |         |             |         |         |             |         |
| Yes                        | 1.47    | (1.23-1.76) | <0.001  |         |             |         |         |             |         |
| MetS                       |         |             |         |         |             |         |         |             |         |
| No                         |         |             |         | 1       |             |         |         |             |         |
| Yes                        |         |             |         | 1.20    | (1.06-1.35) | 0.005   |         |             |         |
| Individual MetS components |         |             |         |         |             |         |         |             |         |
| Waist                      |         |             |         |         |             |         |         |             |         |
| Normal                     |         |             |         |         |             |         | 1       |             |         |
| Elevated                   |         |             |         |         |             |         | 1.30    | (1.14-1.48) | <0.001  |
| Fasting glucose            |         |             |         |         |             |         |         |             |         |
| Normal                     |         |             |         |         |             |         | 1       |             |         |
| Elevated                   |         |             |         |         |             |         | 1.00    | (0.88-1.14) | 0.956   |
| Triglyceride               |         |             |         |         |             |         |         |             |         |
| Normal                     |         |             |         |         |             |         | 1       |             |         |
| Elevated                   |         |             |         |         |             |         | 1.06    | (0.94-1.21) | 0.336   |
| HDL                        |         |             |         |         |             |         |         |             |         |
| Normal                     |         |             |         |         |             |         | 1       |             |         |
| Reduced                    |         |             |         |         |             |         | 1.01    | (0.88-1.15) | 0.895   |
| Blood pressure             |         |             |         |         |             |         |         |             |         |
| Normal                     |         |             |         |         |             |         | 1       |             |         |
| Elevated                   |         |             |         |         |             |         | 1.27    | (1.09-1.47) | 0.002   |

Logistic regression analysis using periodontal disease as the dependent variable and country as the independent variables.

Participants who received periodontal examination and had more than 10 teeth (n = 3,217 in Korean and n = 2,067 in Japanese).

Diabetes, MetS, and individual MetS components were included in Model 1, 2, and 3, respectively.

All models were adjusted for age, sex, number of teeth, number of decayed and filled teeth, dental visit, current smoking, and occupation.

OR, odds ratio; CI, confidence interval; MetS, metabolic syndrome; HDL, high density lipoprotein.

Supplementary Table 1. Estimates for odds ratio of periodontal disease for Japanese compared to Koreans with adjustment for an unmeasured factors.

| OR* | P1 <sup>‡</sup> | P0 <sup>†</sup>         | 0.05                    | 0.1                     | 0.2                     | 0.3              | 0.5              | 0.8 |
|-----|-----------------|-------------------------|-------------------------|-------------------------|-------------------------|------------------|------------------|-----|
| 1.8 | 0.05            | 1.68 (1.42-2.00)        | 1.75 (1.47-2.08)        | 1.88 (1.58-2.23)        | 2.01 (1.69-2.38)        | 2.27 (1.91-2.69) | 2.65 (2.23-3.15) |     |
|     | 0.1             | 1.62 (1.36-1.93)        | 1.68 (1.42-2.00)        | 1.81 (1.52-2.15)        | 1.93 (1.63-2.30)        | 2.18 (1.84-2.59) | 2.55 (2.15-3.04) |     |
|     | 0.2             | 1.51 (1.27-1.79)        | 1.57 (1.32-1.86)        | 1.68 (1.42-2.00)        | 1.80 (1.51-2.14)        | 2.03 (1.71-2.41) | 2.38 (2.00-2.83) |     |
|     | 0.3             | 1.41 (1.19-1.68)        | 1.47 (1.23-1.74)        | 1.57 (1.33-1.87)        | 1.68 (1.42-2.00)        | 1.90 (1.60-2.26) | 2.23 (1.87-2.64) |     |
|     | 0.5             | 1.25 (1.05-1.49)        | 1.30 (1.09-1.54)        | 1.39 (1.17-1.66)        | 1.49 (1.25, 1.77)       | 1.68 (1.42-2.00) | 1.97 (1.66-2.34) |     |
|     | 0.8             | <b>1.07 (0.90-1.27)</b> | <b>1.11 (0.93-1.32)</b> | 1.19 (1.00-1.41)        | 1.27 (1.07-1.51)        | 1.44 (1.21-1.71) | 1.68 (1.42-2.00) |     |
| 2.2 | 0.05            | 1.68 (1.42-2.00)        | 1.78 (1.50-2.11)        | 1.97 (1.66-2.34)        | 2.16 (1.82-2.57)        | 2.54 (2.14-3.02) | 3.11 (2.62-3.70) |     |
|     | 0.1             | 1.59 (1.34-1.89)        | 1.68 (1.42-2.00)        | 1.86 (1.57-2.21)        | 2.04 (1.72-2.43)        | 2.40 (2.02-2.86) | 2.94 (2.48-3.50) |     |
|     | 0.2             | 1.44 (1.21-1.71)        | 1.52 (1.28-1.81)        | 1.68 (1.42-2.00)        | 1.85 (1.55-2.19)        | 2.17 (1.83-2.58) | 2.66 (2.24-3.16) |     |
|     | 0.3             | 1.31 (1.10-1.56)        | 1.39 (1.17-1.65)        | 1.53 (1.29-1.82)        | 1.68 (1.42-2.00)        | 1.98 (1.67-2.35) | 2.42 (2.04-2.88) |     |
|     | 0.5             | <b>1.11 (0.94-1.32)</b> | <b>1.18 (0.99-1.40)</b> | 1.30 (1.10-1.55)        | 1.43 (1.20-1.70)        | 1.68 (1.42-2.00) | 2.06 (1.74-2.45) |     |
|     | 0.8             | <b>0.91 (0.77-1.08)</b> | <b>0.96 (0.81-1.14)</b> | <b>1.06 (0.90-1.26)</b> | <b>1.17 (0.98-1.39)</b> | 1.37 (1.16-1.63) | 1.68 (1.42-2.00) |     |

OR (95%CI)

OR were adjusted for diabetes, covariates, and an unmeasured factor having an OR of periodontal disease of 1.8 or 2.2.

Bold indicates that OR was not significant.

\*OR of periodontal disease comparing between participants with and without an unmeasured factor.

<sup>†</sup>Prevalence of an unmeasured factor in Koreans

<sup>‡</sup>Prevalence of an unmeasured factor in Japanese

OR, odds ratio; CI, confidence interval.

Supplementary Table 2. Regression coefficients for number of teeth according to country.

|                            | Model 1                         |         | Model 2                         |         | Model 3                         |         |
|----------------------------|---------------------------------|---------|---------------------------------|---------|---------------------------------|---------|
|                            | $\beta$ coefficient<br>(95% CI) | p value | $\beta$ coefficient<br>(95% CI) | p value | $\beta$ coefficient<br>(95% CI) | p value |
| Country                    |                                 |         |                                 |         |                                 |         |
| Korea                      |                                 |         |                                 |         |                                 |         |
| Japan                      | 0.19 (0.17; 0.21)               | <0.001  | 0.19 (0.17; 0.21)               | <0.001  | 0.19 (0.17; 0.22)               | <0.001  |
| Diabetes                   |                                 |         |                                 |         |                                 |         |
| No                         |                                 |         |                                 |         |                                 |         |
| Yes                        | -0.04 (-0.06; -0.02)            | <0.001  |                                 |         |                                 |         |
| MetS                       |                                 |         |                                 |         |                                 |         |
| No                         |                                 |         |                                 |         |                                 |         |
| Yes                        |                                 |         | -0.03 (-0.04; -0.01)            | <0.001  |                                 |         |
| Individual MetS components |                                 |         |                                 |         |                                 |         |
| Waist                      |                                 |         |                                 |         |                                 |         |
| Normal                     |                                 |         |                                 |         |                                 |         |
| Elevated                   |                                 |         |                                 |         | -0.006 (-0.019; 0.006)          | 0.314   |
| Fasting glucose            |                                 |         |                                 |         |                                 |         |
| Normal                     |                                 |         |                                 |         |                                 |         |
| Elevated                   |                                 |         |                                 |         | -0.007 (-0.019; 0.005)          | 0.248   |
| Triglyceride               |                                 |         |                                 |         |                                 |         |
| Normal                     |                                 |         |                                 |         |                                 |         |
| Elevated                   |                                 |         |                                 |         | -0.007 (-0.020; 0.005)          | 0.251   |
| HDL                        |                                 |         |                                 |         |                                 |         |
| Normal                     |                                 |         |                                 |         |                                 |         |
| Reduced                    |                                 |         |                                 |         | -0.007 (-0.019; 0.005)          | 0.237   |
| Blood pressure             |                                 |         |                                 |         |                                 |         |
| Normal                     |                                 |         |                                 |         |                                 |         |
| Elevated                   |                                 |         |                                 |         | -0.007 (-0.019; 0.004)          | 0.216   |

Participants who received periodontal examination (n = 3,428 in Korea and n = 2,153 in Japan).

Generalized linear models with a Poisson probability distribution using number of teeth as the dependent variable and country as the independent variables.

Diabetes, MetS, and individual MetS components were included in Model 1, 2, and 3, respectively.

All models were adjusted for age, sex, number of teeth, number of decayed and filled teeth, dental visit, current smoking, and job.

CI, confidence interval; MetS, metabolic syndrome; HDL, high density lipoprotein.

Supplementary Table 3. Adjusted odds ratio for periodontal disease stratified by number of teeth.

|                                                         | Model 1          | Model 2          |
|---------------------------------------------------------|------------------|------------------|
|                                                         | OR (95% CI)      | OR (95% CI)      |
| 10-19 teeth (n = 405 in Korea and n = 258 in Japan)     |                  |                  |
| Country                                                 |                  |                  |
| Korea                                                   | 1                | 1                |
| Japan                                                   | 2.53 (1.69-3.78) | 2.51 (1.68-3.75) |
| Diabetes                                                |                  |                  |
| No                                                      | 1                |                  |
| Yes                                                     | 1.14 (0.77-1.70) |                  |
| MetS                                                    |                  |                  |
| No                                                      |                  | 1                |
| Yes                                                     |                  | 1.22 (0.88-1.71) |
| 20-27 teeth (n = 1,463 in Korea and n = 1,089 in Japan) |                  |                  |
| Country                                                 |                  |                  |
| Korea                                                   | 1                | 1                |
| Japan                                                   | 1.58 (1.20-2.07) | 1.57 (1.20-2.06) |
| Diabetes                                                |                  |                  |
| No                                                      | 1                |                  |
| Yes                                                     | 1.46 (1.14-1.86) |                  |
| MetS                                                    |                  |                  |
| No                                                      |                  | 1                |
| Yes                                                     |                  | 1.06 (0.89-1.26) |
| ≥28 teeth (n = 1,349 in Korea and n = 720 in Japan)     |                  |                  |
| Country                                                 |                  |                  |
| Korea                                                   | 1                | 1                |
| Japan                                                   | 1.50 (1.02-2.19) | 1.46 (0.99-2.14) |
| Diabetes                                                |                  |                  |
| No                                                      | 1                |                  |
| Yes                                                     | 1.78 (1.26-2.52) |                  |
| MetS                                                    |                  |                  |
| No                                                      |                  | 1                |
| Yes                                                     |                  | 1.33 (1.07-1.67) |

Logistic regression analysis using periodontal disease as the dependent variable and country as the independent variables.

Diabetes and MetS were included in Model 1 and 2, respectively.

All models were adjusted for age, sex, number of teeth, number of decayed and filled teeth, dental visit, current smoking, and job.

OR, odds ratio; CI, confidence interval; KNHANES, Korean National Health and Nutrition Examination Survey; MetS, metabolic syndrome.



**STROBE 2007 (v4) Statement—Checklist of items that should be included in reports of *cross-sectional studies***

| Section/Topic                | Item # | Recommendation                                                                                                                                                                       | Reported on page # |
|------------------------------|--------|--------------------------------------------------------------------------------------------------------------------------------------------------------------------------------------|--------------------|
| <b>Title and abstract</b>    | 1      | (a) Indicate the study’s design with a commonly used term in the title or the abstract                                                                                               | 3                  |
|                              |        | (b) Provide in the abstract an informative and balanced summary of what was done and what was found                                                                                  | 3-4                |
| <b>Introduction</b>          |        |                                                                                                                                                                                      |                    |
| Background/rationale         | 2      | Explain the scientific background and rationale for the investigation being reported                                                                                                 | 6-8                |
| Objectives                   | 3      | State specific objectives, including any prespecified hypotheses                                                                                                                     | 8                  |
| <b>Methods</b>               |        |                                                                                                                                                                                      |                    |
| Study design                 | 4      | Present key elements of study design early in the paper                                                                                                                              | 8-9                |
| Setting                      | 5      | Describe the setting, locations, and relevant dates, including periods of recruitment, exposure, follow-up, and data collection                                                      | 8-9                |
| Participants                 | 6      | (a) Give the eligibility criteria, and the sources and methods of selection of participants                                                                                          | 8-9                |
| Variables                    | 7      | Clearly define all outcomes, exposures, predictors, potential confounders, and effect modifiers. Give diagnostic criteria, if applicable                                             | 9-12               |
| Data sources/<br>measurement | 8*     | For each variable of interest, give sources of data and details of methods of assessment (measurement). Describe comparability of assessment methods if there is more than one group | 9-12               |
| Bias                         | 9      | Describe any efforts to address potential sources of bias                                                                                                                            | 13-14              |
| Study size                   | 10     | Explain how the study size was arrived at                                                                                                                                            | 8-9                |
| Quantitative variables       | 11     | Explain how quantitative variables were handled in the analyses. If applicable, describe which groupings were chosen and why                                                         | 12-13              |
| Statistical methods          | 12     | (a) Describe all statistical methods, including those used to control for confounding                                                                                                | 12-13              |
|                              |        | (b) Describe any methods used to examine subgroups and interactions                                                                                                                  |                    |
|                              |        | (c) Explain how missing data were addressed                                                                                                                                          | 8-9                |
|                              |        | (d) If applicable, describe analytical methods taking account of sampling strategy                                                                                                   |                    |
|                              |        | (e) Describe any sensitivity analyses                                                                                                                                                | 13                 |
| <b>Results</b>               |        |                                                                                                                                                                                      |                    |

|                          |     |                                                                                                                                                                                                              |       |
|--------------------------|-----|--------------------------------------------------------------------------------------------------------------------------------------------------------------------------------------------------------------|-------|
| Participants             | 13* | (a) Report numbers of individuals at each stage of study—eg numbers potentially eligible, examined for eligibility, confirmed eligible, included in the study, completing follow-up, and analysed            | 8-9   |
|                          |     | (b) Give reasons for non-participation at each stage                                                                                                                                                         | 8-9   |
|                          |     | (c) Consider use of a flow diagram                                                                                                                                                                           |       |
| Descriptive data         | 14* | (a) Give characteristics of study participants (eg demographic, clinical, social) and information on exposures and potential confounders                                                                     | 13    |
|                          |     | (b) Indicate number of participants with missing data for each variable of interest                                                                                                                          | 8-9   |
| Outcome data             | 15* | Report numbers of outcome events or summary measures                                                                                                                                                         | 13    |
| Main results             | 16  | (a) Give unadjusted estimates and, if applicable, confounder-adjusted estimates and their precision (eg, 95% confidence interval). Make clear which confounders were adjusted for and why they were included | 13    |
|                          |     | (b) Report category boundaries when continuous variables were categorized                                                                                                                                    |       |
|                          |     | (c) If relevant, consider translating estimates of relative risk into absolute risk for a meaningful time period                                                                                             |       |
| Other analyses           | 17  | Report other analyses done—eg analyses of subgroups and interactions, and sensitivity analyses                                                                                                               | 14-15 |
| <b>Discussion</b>        |     |                                                                                                                                                                                                              |       |
| Key results              | 18  | Summarise key results with reference to study objectives                                                                                                                                                     | 14    |
| Limitations              | 19  | Discuss limitations of the study, taking into account sources of potential bias or imprecision. Discuss both direction and magnitude of any potential bias                                                   | 18-19 |
| Interpretation           | 20  | Give a cautious overall interpretation of results considering objectives, limitations, multiplicity of analyses, results from similar studies, and other relevant evidence                                   | 18-19 |
| Generalisability         | 21  | Discuss the generalisability (external validity) of the study results                                                                                                                                        | 18    |
| <b>Other information</b> |     |                                                                                                                                                                                                              |       |
| Funding                  | 22  | Give the source of funding and the role of the funders for the present study and, if applicable, for the original study on which the present article is based                                                | 20    |

\*Give information separately for cases and controls in case-control studies and, if applicable, for exposed and unexposed groups in cohort and cross-sectional studies.

**Note:** An Explanation and Elaboration article discusses each checklist item and gives methodological background and published examples of transparent reporting. The STROBE checklist is best used in conjunction with this article (freely available on the Web sites of PLoS Medicine at <http://www.plosmedicine.org/>, Annals of Internal Medicine at <http://www.annals.org/>, and Epidemiology at <http://www.epidem.com/>). Information on the STROBE Initiative is available at [www.strobe-statement.org](http://www.strobe-statement.org).

# BMJ Open

## Comparison of the periodontal condition in Korean and Japanese adults: a cross-sectional study

|                                 |                                                                                                                                                                                                                                                                                                                                                                                                                                                                                                                                                                                                                                                                                                                                                                                                                                                                                                                                                                                                                                                                                                                                                                                                                                                                     |
|---------------------------------|---------------------------------------------------------------------------------------------------------------------------------------------------------------------------------------------------------------------------------------------------------------------------------------------------------------------------------------------------------------------------------------------------------------------------------------------------------------------------------------------------------------------------------------------------------------------------------------------------------------------------------------------------------------------------------------------------------------------------------------------------------------------------------------------------------------------------------------------------------------------------------------------------------------------------------------------------------------------------------------------------------------------------------------------------------------------------------------------------------------------------------------------------------------------------------------------------------------------------------------------------------------------|
| Journal:                        | <i>BMJ Open</i>                                                                                                                                                                                                                                                                                                                                                                                                                                                                                                                                                                                                                                                                                                                                                                                                                                                                                                                                                                                                                                                                                                                                                                                                                                                     |
| Manuscript ID                   | bmjopen-2018-024332.R1                                                                                                                                                                                                                                                                                                                                                                                                                                                                                                                                                                                                                                                                                                                                                                                                                                                                                                                                                                                                                                                                                                                                                                                                                                              |
| Article Type:                   | Research                                                                                                                                                                                                                                                                                                                                                                                                                                                                                                                                                                                                                                                                                                                                                                                                                                                                                                                                                                                                                                                                                                                                                                                                                                                            |
| Date Submitted by the Author:   | 03-Aug-2018                                                                                                                                                                                                                                                                                                                                                                                                                                                                                                                                                                                                                                                                                                                                                                                                                                                                                                                                                                                                                                                                                                                                                                                                                                                         |
| Complete List of Authors:       | Furuta, Michiko; Faculty of Dental Science, Kyushu University, Section of Preventive and Public Health Dentistry, Division of Oral Health, Growth and Development<br>Takeuchi, Kenji; Kyushu University, Section of Preventive and Public Health Dentistry<br>Shimazaki, Yoshihiro ; Aichi-Gakuin University, Department of Preventive Dentistry and Dental Public Health, School of Dentistry<br>Takeshita, Toru; Kyushu University, Section of Preventive and Public Health Dentistry; Kyushu University, OBT Research Center<br>Shibata, Yukie; Faculty of Dental Science, Kyushu University, Section of Preventive and Public Health Dentistry, Division of Oral Health, Growth and Development<br>Hata, Jun; Kyushu University, Department of Environmental Medicine, Kyushu University<br>Yoshida, Daigo; Kyushu University, Department of Epidemiology and Public Health, Graduate School of Medical Sciences<br>Park, Deok-Young; College of Dentistry, Gangneung-Wonju National University, Department of Preventive and Public Health Dentistry<br>Ninomiya, Toshiharu; Graduate School of Medical Sciences, Kyushu University, Department of Epidemiology and Public Health<br>Yamashita, Yoshihisa; Kyushu Univ, Preventive and Public Health Dentistry |
| <b>Primary Subject Heading</b>: | Dentistry and oral medicine                                                                                                                                                                                                                                                                                                                                                                                                                                                                                                                                                                                                                                                                                                                                                                                                                                                                                                                                                                                                                                                                                                                                                                                                                                         |
| Secondary Subject Heading:      | Epidemiology                                                                                                                                                                                                                                                                                                                                                                                                                                                                                                                                                                                                                                                                                                                                                                                                                                                                                                                                                                                                                                                                                                                                                                                                                                                        |
| Keywords:                       | EPIDEMIOLOGY, PUBLIC HEALTH, ORAL MEDICINE                                                                                                                                                                                                                                                                                                                                                                                                                                                                                                                                                                                                                                                                                                                                                                                                                                                                                                                                                                                                                                                                                                                                                                                                                          |
|                                 |                                                                                                                                                                                                                                                                                                                                                                                                                                                                                                                                                                                                                                                                                                                                                                                                                                                                                                                                                                                                                                                                                                                                                                                                                                                                     |

SCHOLARONE™  
Manuscripts

1 **Comparison of the periodontal condition in Korean and Japanese adults: a**  
2 **cross-sectional study**

3  
4 Michiko Furuta<sup>1</sup>, Kenji Takeuchi<sup>1,2</sup>, Yoshihiro Shimazaki<sup>3</sup>, Toru Takeshita<sup>1,2</sup>, Yukie  
5 Shibata<sup>1</sup>, Jun Hata<sup>4,5,6</sup>, Daigo Yoshida<sup>4</sup>, Deok-Young Park<sup>7</sup>, Toshiharu Ninomiya<sup>4,5</sup>,  
6 Yoshihisa Yamashita<sup>1</sup>

7  
8 <sup>1</sup> Section of Preventive and Public Health Dentistry, Division of Oral Health, Growth  
9 and Development, Faculty of Dental Science, Kyushu University, Fukuoka, Japan

10 <sup>2</sup> OBT Research Center, Faculty of Dental Science, Kyushu University, Fukuoka, Japan

11 <sup>3</sup> Department of Preventive Dentistry and Dental Public Health, School of Dentistry,  
12 Aichi-Gakuin University

13 <sup>4</sup> Department of Epidemiology and Public Health, Graduate School of Medical Sciences,  
14 Kyushu University, Fukuoka, Japan

15 <sup>5</sup> Center for Cohort Studies, Graduate School of Medical Sciences, Kyushu University,  
16 Fukuoka, Japan

17 <sup>6</sup> Department of Medicine and Clinical Science, Graduate School of Medical Sciences,  
18 Kyushu University, Fukuoka, Japan

19 <sup>7</sup> Department of Preventive and Public Health Dentistry, College of Dentistry,  
20 Gangneung-Wonju National University, Gangneung, Korea

21  
22 **Correspondence:** Yoshihisa Yamashita, Section of Preventive and Public Health  
23 Dentistry, Division of Oral Health, Growth and Development, Faculty of Dental Science,  
24 Kyushu University, 3-1-1 Maidashi, Higashi-ku, Fukuoka 812-8582, Japan. Fax:

1  
2  
3  
4  
5  
6 1 81-92-642-6354; E-mail: yoshi@dent.kyushu-u.ac.jp  
7

8 2 **Number of words in the text:** 3766 words  
9

10 3  
11

12 4  
13

14 5  
15  
16  
17  
18  
19  
20  
21  
22  
23  
24  
25  
26  
27  
28  
29  
30  
31  
32  
33  
34  
35  
36  
37  
38  
39  
40  
41  
42  
43  
44  
45  
46  
47  
48  
49  
50  
51  
52  
53  
54  
55  
56  
57  
58  
59  
60

For peer review only

1  
2  
3  
4  
5  
6  
7  
8  
9  
10  
11  
12  
13  
14  
15  
16  
17  
18  
19  
20  
21  
22  
23  
24  
25  
26  
27  
28  
29  
30  
31  
32  
33  
34  
35  
36  
37  
38  
39  
40  
41  
42  
43  
44  
45  
46  
47  
48  
49  
50  
51  
52  
53  
54  
55  
56  
57  
58  
59  
60

1 **Abstract**

2 **Objectives** Reports from national surveys in South Korea and Japan have indicated that  
3 the prevalence of periodontal disease is lower in Korea than in Japan. However, these  
4 national surveys have not evaluated factors related to periodontal health condition,  
5 including diabetes and metabolic syndrome. This study compared periodontal  
6 conditions between Korean and Japanese adults, in the context of general health status.

7 **Design** Cross-sectional study

8 **Setting** National survey in South Korea (Korean National Health and Nutrition  
9 Examination Survey "KNHANES") and a population-based study in Japan (Hisayama  
10 study); both were conducted in 2012

11 **Participants** This study included 3,574 Korean and 2,205 Japanese adults aged 40-79  
12 years.

13 **Outcome measures** Periodontal condition was assessed by using the Community  
14 Periodontal Index (CPI). Examiners in Japan underwent clinical calibration training for  
15 periodontal examination with a gold standard examiner from KNHANES, prior to the  
16 Hisayama study.

17 **Results:** The age-adjusted prevalences of periodontal disease, defined as CPI score  $\geq 3$ ,  
18 were 31.4% and 42.1% in South Korea and Japan, respectively ( $p < 0.001$ ). The  
19 age-adjusted prevalences of diabetes ( $p = 0.018$ ) and metabolic syndrome ( $p = 0.001$ )  
20 were higher in Korea than in Japan. The numbers of present and filled teeth and  
21 percentages of participants who visited a dental clinic in the last 12 months were higher  
22 in Japan than in Korea (all  $p < 0.001$ ). Logistic regression analysis showed that the  
23 Japanese participants were more likely to have periodontal disease than were the Korean  
24 participants, after adjusting for age, sex, occupation, oral health status, oral health

1 behavior, diabetes, and metabolic syndrome.

2 **Conclusions:** A higher prevalence of periodontal disease was found in Japanese  
3 participants than in Korean participants. Further studies are needed to more clearly  
4 elucidate factors underlying the difference in periodontal conditions between the two  
5 populations, including those related to the dental health care system and dietary intake.

6

For peer review only

1  
2  
3  
4  
5  
6  
7  
8  
9  
10  
11  
12  
13  
14  
15  
16  
17  
18  
19  
20  
21  
22  
23  
24  
25  
26  
27  
28  
29  
30  
31  
32  
33  
34  
35  
36  
37  
38  
39  
40  
41  
42  
43  
44  
45  
46  
47  
48  
49  
50  
51  
52  
53  
54  
55  
56  
57  
58  
59  
60

1 **Strengths and limitations of this study**

- 2 • This is the first study to compare periodontal disease between Korean and Japanese  
3 people, in relation to systemic diseases.
- 4 • This study included a large representative population in Korea, based on a national  
5 survey, and a community-based population in Japan.
- 6 • The examiners in the Japanese survey underwent clinical calibration training for the  
7 periodontal examination with a gold standard examiner from the Korean survey.
- 8 • Periodontal condition was evaluated by using partial mouth assessment; thus, it was  
9 possible to underestimate the prevalence of periodontal disease.
- 10



## 1 **Introduction**

2 According to the World Health Organization (WHO) Global Oral Health Data Bank,<sup>1</sup>  
3 the prevalence of periodontal disease, as defined by the Community Periodontal Index  
4 (CPI) code  $\geq 3$ , was 4–37% in 35–44-year-olds, and 20–52% in 65–74-year-olds, among  
5 Asian countries (including the least developed to the highly industrialized) that  
6 conducted national surveys from 1999 to 2012. The general health conditions and health  
7 care systems vary widely among countries in Asia, depending on their levels of  
8 economic development. Oral health conditions and oral health care systems in this  
9 region also vary widely.<sup>2</sup> Thus, differences in socioeconomic status might contribute to  
10 inequalities in oral health among Asian countries.

11 Surprisingly, the results of national surveys in Korea and Japan indicate that the  
12 prevalence of periodontal disease is lower in Korea (32.9% and 23.9% of individuals  
13 aged 19 and over in 2008 and 2010, respectively)<sup>3</sup> than in Japan (44.7% and 41.5% of  
14 individuals aged 19 and over in 2005 and 2011, respectively).<sup>4</sup> Among Asian countries,  
15 South Korea (hereafter “Korea”) and Japan are located in close proximity; they share  
16 similar economic and ethnic backgrounds. The gross domestic product per capita in  
17 2016 was \$27,534 in Korea and \$38,895 in Japan.<sup>5</sup> The Korean and Japanese  
18 populations belong primarily to the northern Mongoloid group, and Koreans are  
19 genetically closer to the Japanese than to other Mongoloid groups.<sup>6</sup>

20 With regard to health care systems, the governments of both Korea and Japan  
21 provide national health insurance that covers the entire population. In Korea, dental  
22 treatment covered by health insurance is limited; however, in recent years, dental  
23 insurance coverage has expanded, and denture treatment in individuals aged 65 and over  
24 (from 2016) and periodontal scaling (from 2013) has been covered.<sup>7</sup> In contrast, in

1  
2  
3  
4  
5 1 Japan, national health insurance covers almost all dental treatments, such as treatment  
6  
7 2 for dental caries, including endodontic treatment; periodontal disease; prosthetic  
8  
9 3 treatment; and extraction. Periodontal treatment in Japan has been covered by health  
10  
11 4 insurance since 1972. The size of the dental workforce is larger in Japan than in Korea;  
12  
13 5 population ratios of dentists were reported as 5.0 and 7.4 per 10,000 people in Korea  
14  
15 6 and Japan, respectively.<sup>8</sup> Additionally, the population ratios of practicing dental  
16  
17 7 hygienists were 4.9 and 8.5 per 10,000 people in Korea and Japan, respectively.<sup>9</sup> These  
18  
19 8 data suggest that the Japanese may have an increased likelihood of receiving periodontal  
20  
21 9 treatment and preventing care compared with Koreans, considering the greater dental  
22  
23 10 insurance coverage and higher numbers of dentists and dental hygienists. Differences in  
24  
25 11 health care systems between Korean and Japan seem to contradict the levels of  
26  
27 12 periodontal health in these two countries.

28  
29  
30  
31 13 However, great significance cannot be attached to the reports of these national  
32  
33 14 surveys, as potential risk factors related to periodontal disease are not considered.  
34  
35 15 Growing evidence from epidemiological studies indicates that diabetes and metabolic  
36  
37 16 syndrome are associated with periodontal disease.<sup>10 11</sup> When comparing periodontal  
38  
39 17 disease among different countries, the effects of systemic health on periodontal disease  
40  
41 18 and other risk factors should be addressed. Thus, a comparison of geographical and  
42  
43 19 racial differences in periodontal disease, and interpretations of the reasons for these  
44  
45 20 differences, are essential for preventing periodontal disease. The objective of this study  
46  
47 21 was to investigate whether periodontal condition differed between Korean and Japanese  
48  
49 22 adults, in relation to the effects of diabetes and metabolic syndrome.

50  
51  
52 23

## 53 54 24 **Methods**

55  
56  
57  
58  
59  
60

## 1 *Study population*

2 In the present study, data for Koreans were collected from a subset of the Fifth Korean  
3 National Health and Nutrition Examination Survey (KNHANES), a nationwide  
4 cross-sectional survey conducted in 2012 by the Korea Center for Disease Control and  
5 Prevention. Participants were selected by using a multi-stage clustered probability  
6 design to produce a nationally representative non-institutionalized civilian sample. All  
7 participants provided written informed consent. Additional information regarding the  
8 KNHANES can be found elsewhere.<sup>12</sup> The present study included 3,955 participants  
9 from the 2012 survey, aged 40–79 years, who received medical and dental examinations  
10 in addition to a health interview. After excluding participants with missing data, 3,574  
11 participants were included in the analysis.

12 Data for Japanese were obtained from the Hisayama study, a population-based  
13 prospective study of cerebro-cardiovascular diseases performed in the town of  
14 Hisayama (a suburban rural area of Fukuoka city in southern Japan). The age and  
15 occupational distributions of the population of this town are approximately  
16 representative of Japan as a whole.<sup>13</sup> A portion of the Hisayama study in 2012  
17 comprised dental examinations for residents aged  $\geq 40$  years. The present study included  
18 2,342 participants, aged 40–79 years, who received both medical and dental  
19 examinations in 2012 (57.8% of the total population in this age group). Written  
20 informed consent was obtained from all participants. After excluding participants with  
21 missing data, 2,205 participants were included in the analysis.

22 The study was approved by the Kyushu University Institutional Review Board  
23 for Clinical Research (Approval No. 24-129).

24

### 1 *Assessment of periodontal condition and dental caries*

2 Periodontal condition was assessed by using the CPI in both KNHANES and Hisayama  
3 studies. In accordance with World Health Organization protocols, 10 teeth were selected  
4 for the periodontal examination: two molars in each posterior sextant, and the upper  
5 right and lower left central incisors. If no index tooth was present in a qualified sextant,  
6 all remaining teeth in that sextant were examined. The highest code among the  
7 examined sextants was recorded, to represent the CPI status for each individual.  
8 Periodontal disease was defined as CPI code  $\geq 3$  (periodontal pocket depth  $\geq 4$  mm).

9 Trained and calibrated dentists assessed periodontal conditions in both  
10 KNHANES and Hisayama studies. To ensure the reliability of measurements with CPI,  
11 seven examiners in the Hisayama study were calibrated to a gold standard examiner in  
12 the 2012 KNHANES. The calibration was performed by conducting examinations on 10  
13 Japanese volunteers who had all six sextants examined. The mean  $\kappa$  value (range)  
14 between examiners in the Hisayama study and the gold standard examiner in the 2012  
15 KNHANES was 0.55 (0.43–0.66) for CPI code.

16 We assessed dental caries by measuring the total numbers of decayed and filled  
17 teeth; this measurement was performed because tooth surface roughness, especially in  
18 cases of subgingival restoration, leads to the accumulation of plaque, which results in  
19 gingival inflammation.<sup>14</sup> Teeth were regarded as filled teeth if they had undergone  
20 permanent restoration (because of previous decay or other reasons) with a fixed dental  
21 prosthesis abutment.

### 22 *Assessment of diabetes and metabolic syndrome*

23 A blood sample was collected from the antecubital vein in the morning, after fasting for  
24

1 at least 8 hours in the KNHANES, and after overnight fasting in the Hisayama study.  
2 Fasting plasma concentrations of glucose, triglycerides, and high-density lipoprotein  
3 (HDL) cholesterol were measured. Revised HDL values were used in the KNHANES,  
4 because HDL values in the same samples differed between the Korean Central  
5 Laboratory and the Centers for Disease Control and Prevention (CDC) in the United  
6 States; conversion rates were calculated by analyzing serum samples sent to the CDC,  
7 using the isotope-dilution gas chromatography-mass spectrometry; this method is  
8 considered the gold standard.<sup>15</sup> Diabetes was defined as fasting glucose  $\geq 126$  mg/dl, or  
9 undergoing treatment for diabetes with medication and/or insulin injections.<sup>16</sup> For the  
10 2012 KNHANES group, hemoglobin A1c was solely assessed for individuals with  
11 diabetes or hyperglycemia (fasting glucose  $\geq 126$  mg/dl), and the oral glucose tolerance  
12 test was not conducted; therefore, the diagnostic criteria of diabetes used in this study  
13 did not correspond with the current diagnostic criteria proposed by the American  
14 Diabetes Association. Metabolic syndrome (MetS) was defined on the basis of a Joint  
15 Interim Statement, using the criteria for Asians:<sup>17</sup> elevated waist circumference ( $\geq 90$  cm  
16 in men and  $\geq 80$  cm in women), elevated fasting glucose levels ( $\geq 100$  mg/dl or drug  
17 treatment for elevated glucose), elevated triglycerides ( $\geq 150$  mg/dl or drug treatment for  
18 elevated triglycerides), reduced HDL ( $< 40$  mg/dl in men and  $< 50$  mg/dl in women), and  
19 elevated blood pressure (systolic blood pressure  $\geq 130$  mmHg or diastolic blood pressure  
20  $\geq 85$  mmHg, or antihypertensive drug treatment). Individuals who were positive for  
21 three or more of these components were considered to have MetS.

### 22 *Measurement of other factors*

24 Information regarding participants' smoking habits, occupational statuses, and dental

1 visits in the last 12 months, was obtained from a health interview in the KNHANES,  
2 and from a self-administered questionnaire in the Hisayama study. Smokers were  
3 categorized as current, never, or former smokers. Socioeconomic status was determined  
4 on the basis of occupational status, which was divided into four categories: clerical  
5 support workers; elementary occupations and unskilled workers; other jobs; and  
6 homemaker, unemployed or retired. "Other jobs" includes professional, skilled, and  
7 service workers, salespeople, farmers, and fishers. We used occupation as a  
8 socioeconomic status indicator; however, we did not directly assess income because the  
9 Hisayama study did not collect income data and the previous KNHANES study (2012)  
10 showed no significant association between income and periodontal disease.<sup>18</sup>

### 12 *Statistical Analysis*

13 The t-test or chi-squared test was used to assess differences in the distribution of age,  
14 sex, and job classification between the KNHANES and Hisayama studies. Age-adjusted  
15 mean values of the numbers of present teeth, decayed teeth, and filled teeth, defined as  
16 quantitative variables, were estimated by using analysis of covariance. The proportions  
17 of periodontal disease, diabetes, MetS, number of teeth, and oral health behaviors,  
18 defined as categorical variables, were adjusted on the basis of age distribution of the  
19 WHO standard population in 2000–2025, by using the direct method. Differences in the  
20 mean values and proportions between countries were tested by linear regression  
21 modeling and logistic regression analysis, respectively. The association between  
22 periodontal disease (dependent variable) and country (independent variable) was  
23 assessed by using logistic regression analysis. We included participants who had more  
24 than 10 teeth in this analysis because all of them had at least one sextant in CPI. The

1 association between number of teeth (dependent variable) and country (independent  
2 variable) was investigated by using generalized linear models with a Poisson probability  
3 distribution. Logistic regression models and generalized linear models were tested:  
4 model 1 included diabetes; model 2 included MetS; and model 3 included individual  
5 MetS components. Standard errors were estimated by using robust or sandwich variance  
6 estimators of the covariance matrix of the regression coefficients, to correct for  
7 heteroskedasticity across countries. Odds ratio (OR),  $\beta$  coefficients, and 95%  
8 confidence interval (CI) derived from corrected standard errors were calculated. The  
9 impact of an unmeasured confounder on the estimated OR was examined in sensitivity  
10 analyses, based on Lin et al.<sup>19</sup> SPSS software (version 19.0 for Windows; IBM SPSS  
11 Japan, Tokyo, Japan) and R version 3.2.1 were used for data analyses.  $P < 0.05$  was  
12 considered statistically significant in all analyses.

#### 14 *Patient and public involvement*

15 KNHANES data used in this study comprise nationwide data, which is collected  
16 annually by the Korea Center for Disease Control and Prevention; these data are  
17 publicly available to researchers. Participants in the Hisayama study were recruited with  
18 the help of the Health C&C Center Hisayama, which provided healthcare services to the  
19 residents of Hisayama. None of our participants were involved in the recruitment or  
20 conduct of either study that has provided data for this report.

#### 22 **Results**

23 Demographic characteristics of the study participants in Korea and Japan are shown in  
24 Table 1. Participants in Korea were significantly younger than those in Japan. Using

1 age-adjusted means, and the frequencies of dental and systemic parameters, it was  
2 observed that the percentage of participants with periodontal disease, and the mean  
3 numbers of present and filled teeth, were significantly higher in Japan than in Korea  
4 (Table 2). The percentages of participants with diabetes and MetS were significantly  
5 higher in Korea than in Japan. In terms of individual MetS components, participants in  
6 Japan had a higher prevalence of elevated fasting glucose and blood pressure, and a  
7 lower prevalence of elevated triglycerides and reduced HDL, compared with those in  
8 Korea.

9         Logistic regression analyses showed that the Japanese participants were more  
10 likely to have periodontal disease than were the Korean participants (OR = 1.68, 95%  
11 CI: 1.41–2.00); this was consistent even when diabetes and other covariates, including  
12 age, sex, number of teeth, number of decayed and filled teeth, dental visits, smoking,  
13 and occupation, were included in the model (Table 3). Similar results were observed in  
14 models that included MetS and individual MetS components.

## 16 **Discussion**

17 This study showed that periodontal disease was more prevalent in Japanese participants  
18 than in Korean participants, even after adjustment for diabetes and MetS. Our results  
19 suggest that this difference in prevalence was not related to the participants' systemic  
20 conditions. The strength of our study lies in the fact that the examiners in Japan  
21 underwent calibration for periodontal examination with a gold standard examiner from  
22 the KNHANES, which helped to reduce bias in the prevalence estimates.

23         With regard to the results of the logistic regression models, the proportion of  
24 variance explained by the model adjusted for diabetes and covariates was relatively low



1 (Nagelkerke's R-squared 13.6%). This suggests that unmeasured factors might be  
2 associated with the differences in periodontal condition between Korean and Japanese  
3 participants. In post hoc sensitivity analyses, the association between country and  
4 periodontal disease was not significant in the logistic model; it was significant solely  
5 when there was a significant difference in the proportions of an unmeasured factor  
6 between Korean and Japanese participants (Supplementary Table 1). In this model,  
7 periodontal disease could possibly be explained in relation to unmeasured factors, rather  
8 than in relation to country, which suggests that unmeasured factors contribute to the  
9 differences in periodontal condition.

10       Several factors, such as oral microbiota and dietary intake, could be the  
11 unmeasured factors that may have influenced our findings. We have previously shown  
12 higher proportions of *Prevotella* and *Veillonella*, and lower proportions of *Neisseria* and  
13 *Haemophilus*, in the salivary microbiome of Japanese from the Hisayama study,  
14 compared with Koreans from the Yangpyeong cohort study undertaken in Yangpyeong  
15 County (a suburb of the Seoul metropolitan area).<sup>20</sup> Similar to our present study, the  
16 previous study showed that the periodontal condition of the Japanese was worse than  
17 that of the Koreans in the Yangpyeong cohort study, by measuring the periodontal  
18 pocket depth and clinical attachment level on mesio-buccal and mid-buccal sites of 12  
19 specific index teeth;<sup>20</sup> the study indicated that a greater proportion of dysbiotic oral  
20 microbiota in the Japanese is associated with a worse periodontal condition, compared  
21 with the Koreans. Thus, the difference in periodontal condition between Koreans and  
22 Japanese may be associated with disparities in their oral microbiota. It is difficult to  
23 determine the exact cause of differences in microbiomes between Koreans and Japanese.  
24 The Japanese in our previous study had a greater proportion of dysbiotic oral

1 microbiota; this, combined with the observation that diabetes and MetS were less  
2 prevalent in the Japanese compared with the Koreans, suggests that systemic disease is  
3 less likely to be related to differences in microbiomes. Alternatively, nutrition and  
4 dietary intake might affect periodontal disease by affecting the oral bacterial community.  
5 Both Korea and Japan are based on agrarian societies and their dietary patterns are  
6 similar;<sup>21</sup> however, Koreans prefer their food spicier or saltier, compared with the  
7 Japanese.<sup>22</sup> Kimchi, a lactic acid fermented vegetable product, is a well-known  
8 traditional Korean food. Koreans consume 96.3 g/day of kimchi, according to the  
9 KNHANES of 2015.<sup>23</sup> In contrast, the Japanese consume 3.6 g/day of pickled  
10 vegetables, such as pickled Chinese cabbage and kimchi, based on the Japanese  
11 National Health and Nutrition Survey of 2014.<sup>24</sup> Kimchi contains high levels of  
12 vitamins, minerals, dietary fibers, and other functional components, and has been  
13 reported to have anticancer, antioxidative, and anti-atherosclerotic effects, as well as  
14 probiotic properties.<sup>25</sup> Lactobacilli are responsible for kimchi fermentation. Probiotic  
15 lactobacilli have been shown to affect oral ecology by specifically preventing the  
16 adherence of other oral bacteria, and by modifying the protein composition of the  
17 salivary pellicle.<sup>26</sup> Thus, high intake of kimchi in Koreans may be associated with a  
18 better oral environment, and a lower prevalence of periodontal disease, compared with  
19 the Japanese.

20 In this study, Japanese participants had a greater number of teeth than did  
21 Korean participants. Generalized linear models showed that the Japanese had a greater  
22 number of teeth ( $\beta$  coefficient = 0.19; 95% CI: 0.17, 0.21) than did Koreans, after  
23 adjusting for diabetes and covariates (Supplementary Table 2). It is conceivable that the  
24 prevalence of periodontal disease was higher in Japan because of the greater number of

1 teeth (notably, teeth with periodontal disease were not extracted in these participants).  
2 Logistic regression models showed that Japanese were more likely to have periodontal  
3 disease than were Koreans, after adjusting for the number of teeth. Additionally, when  
4 we conducted a separate analysis on the basis of the number of teeth (10-19 teeth, 20-27  
5 teeth, and 28 and more teeth), a consistent association between country and periodontal  
6 disease was observed (Supplementary Table 3).

7         Although both Korea and Japan have universal health insurance systems, the  
8 cost of dental care is lower in Japan than in Korea. Japanese health insurance covers  
9 almost all basic dental treatments such as endodontic, periodontal, and prosthetic  
10 treatments including bridge and removable dentures. The cost of dental treatment in  
11 Japan is approximately \$24 (with an exchange rate of 100 yen per dollar) for resin  
12 filling in a single cavity; \$60 for infected root canal treatment in a molar with three root  
13 canals; \$140 for a gold/silver palladium crown with a metal post and core; and \$26 for  
14 molar extractions. Japanese people who receive dental treatment pay only 10–30% of  
15 the total cost of treatment depending on age and income, in the universal health  
16 insurance system. In Korea, universal health insurance covers some treatments such as  
17 endodontic, periodontal, denture treatment, and extraction in individuals of specific age  
18 groups. Resin filling, and prosthetic treatment including crown and bridge, are not  
19 covered. The cost of dental treatment in Korea is approximately \$100 (with an exchange  
20 rate of 1000 won per dollar) for resin filling in a single cavity; \$150 for infected root  
21 canal treatment in a molar with three root canals; \$450 for a gold/silver palladium  
22 crown with a metal post and core; and \$28 for molar extractions. Korean people who  
23 receive infected root canal treatment and extraction pay 30% of the total cost of  
24 treatment in the universal health insurance system. This indicates that the Japanese are

1 more likely to receive restorative and prosthetic treatment than are the Koreans, due to  
2 the lower cost of dental care. Indeed, the numbers of filled teeth (including permanent  
3 restoration by fixed dental prosthesis abutment) were higher in Japanese participants  
4 than in Korean participants in this study (Table 2). Additionally, Japanese participants  
5 reported more dental visits in the last 12 months, compared with the Korean participants  
6 (Table 2). The greater number of teeth in the Japanese may be attributable to the low  
7 economic barriers to obtaining dental care in Japan.

8 In this study, the strength of association between country and periodontal  
9 disease varied among models: the OR of country was 1.68 in Model 1, which included  
10 diabetes; 1.67 in Model 2, which included MetS; and 1.80 in Model 3, which included  
11 individual MetS components (Table 3). This might be due to varying associations  
12 between country and each of the following: diabetes, MetS, and individual MetS  
13 components. The association between country and diabetes or MetS was not significant  
14 among participants who underwent periodontal examination and had more than 10  
15 teeth; however, the associations between country and individual MetS components were  
16 significant (data not shown). The OR of country differed in Model 3 because of  
17 inter-associations among independent variables, such as country and individual MetS  
18 components.

19 Our study has some limitations. First, the Japanese data were derived from a  
20 single town in Japan, whereas Korean data were based on a national survey. The study  
21 cohort in Japan, which comprised residents in Hisayama town, is recognized to be  
22 demographically representative of Japan, according to the national census.<sup>13</sup> The  
23 differences in periodontal conditions observed in this study were consistent with the  
24 reports of a national survey. Therefore, the use of study cohort in Japan to generalize our

1 findings might be acceptable. Second, our findings regarding the differences in  
2 periodontal conditions between Koreans and Japanese may be affected by unmeasured  
3 factors, including oral microbiota and dietary intake. Our previous study compared the  
4 oral microbiota between Koreans and Japanese;<sup>20</sup> however, participants in Korea were  
5 drawn from a convenience sample, rather than a nationally representative sample.  
6 Future studies are needed to compare oral microbiota and dietary intake between  
7 Koreans and Japanese with data from a nationally representative sample, in order to  
8 explore the causes of differences in periodontal conditions. Third, a partial mouth  
9 assessment for periodontal condition was used. Although CPI is an easier approach to  
10 evaluate periodontal condition in the community setting, this method may inherently  
11 underestimate or overestimate the prevalence and severity of periodontal parameters due  
12 to the use of representative teeth and pseudopockets.<sup>27</sup> Additionally, when index teeth  
13 were not present, the exclusion of sextants may have led to an underestimation of  
14 periodontal disease. In this study, all participants with more than 10 teeth had at least  
15 one sextant. The percentages of participants with 0, 1, and 2-5 excluded sextants were  
16 82.7%, 7.0%, and 10.3% in KNHANES and 81.7%, 8.5%, and 9.8% in the Hisayama  
17 study, respectively. Although the number of excluded sextants was relatively low, a  
18 misclassification bias may have affected the magnitude of the observed associations.

19         Despite these limitations, this study revealed interesting findings, and has  
20 several implications. The prevalence of periodontal disease was lower in Koreans than  
21 in Japanese, whereas the prevalences of diabetes and MetS were higher in Koreans than  
22 in Japanese. These findings suggest that systemic conditions are not associated with the  
23 differences in periodontal conditions between Koreans and Japanese. We need  
24 additional studies to identify other factors that may underlie differences in periodontal

1 conditions between countries.

2

3 **Contributors** MF, YS, D-YP, and YY conceived and planned the project. MF, YS, TT,  
4 JH, DY, D-YP, and TN were responsible for acquisition of data. MF, KT, and TT  
5 conducted statistical analysis. MF, KT, and YY wrote the manuscript.

6 **Funding** This work was supported by JSPS KAKENHI Grant Number 16H05850 from  
7 the Ministry of Education, Science, Sports, and Culture of Japan, Tokyo, Japan.

8 **Competing interests** None declared.

9 **Patient consent** Not required in Korean National Health and Nutrition Examination  
10 Survey. Obtained in Hisayama study.

11 **Ethics approval** This study was approved by the Kyushu University Institutional  
12 Review Board for Clinical Research (24-129).

13 **Provenance and peer review** Not commissioned; externally peer reviewed.

14 **Data sharing statement** The original data of Koreans came from Korean National  
15 Health and Nutrition Examination Survey  
16 (<https://knhanes.cdc.go.kr/knhanes/eng/index.do>). No additional data are available in  
17 Hisayama study.

18 **Open Access** This is an Open Access article distributed in accordance with the Creative  
19 Commons Attribution Non Commercial (CC BY-NC 4.0) license, which permits others  
20 to distribute, remix, adapt, build upon this work non-commercially, and license their  
21 derivative works on different terms, provided the original work is properly cited and the  
22 use is non-commercial. See: <http://creativecommons.org/licenses/by-nc/4.0/>

## 1       **References**

- 2       1. World Health Organization. An overview of CPITN data in the WHO Global Oral  
3           Data Bank 2017 [cited 2017, December 23. Available from:  
4           <http://www.dent.niigata-u.ac.jp/prevent/periodo/contents.html> accessed August 2  
5           2017.
- 6       2. Corbet EF, Zee KY, Lo EC. Periodontal diseases in Asia and Oceania. *Periodontol*  
7           *2000* 2002;29:122-52.
- 8       3. Korea Centers for Disease Control and Prevention. Korean national health and  
9           examination surveys 2018 [cited 2018, March 8. Available from:  
10          <http://cdc.go.kr/CDC/intro.html> accessed August 4 2017.
- 11      4. Japanese Ministry of Health Labour and Welfare. Survey of Dental Diseases 2017  
12          [cited 2017, November 1. Available from:  
13          <http://www.mhlw.go.jp/toukei/list/62-17.html> accessed August 4 2017.
- 14      5. The World Bank. World bank data 2017 [cited n.d. Available from:  
15          <http://data.worldbank.org/> accessed August 4 2017.
- 16      6. Abdulla MA, Ahmed I, Assawamakin A, et al. Mapping human genetic diversity in  
17          Asia. *Science* 2009;326:1541-5.
- 18      7. Lee JH, Lee JS, Choi JK, et al. National dental policies and socio-demographic

- 1 factors affecting changes in the incidence of periodontal treatments in Korean: A  
2 nationwide population-based retrospective cohort study from 2002-2013. *BMC*  
3 *oral health* 2016;16:118.
- 4 8. World Health Organization. World Health Statistics 2012 2012 [cited n.d. Available  
5 from: [http://www.who.int/gho/publications/world\\_health\\_statistics/2012/en/](http://www.who.int/gho/publications/world_health_statistics/2012/en/)  
6 accessed August 4 2017.
- 7 9. International Federation of Dental Hygienists. Working abroad as a Dental Hygienist  
8 2018 [cited 2018, February 10. Available from:  
9 [http://www.ifdh.org/work\\_abroad.html](http://www.ifdh.org/work_abroad.html) accessed August 4 2017.
- 10 10. Lamster IB, Pagan M. Periodontal disease and the metabolic syndrome. *Int Dent J*  
11 2017;67:67-77.
- 12 11. Levine RS. Obesity, diabetes and periodontitis--a triangular relationship? *Br Dent J*  
13 2013;215:35-9.
- 14 12. Kweon S, Kim Y, Jang MJ, et al. Data resource profile: the Korea National Health  
15 and Nutrition Examination Survey (KNHANES). *Int J Epidemiol*  
16 2014;43:69-77.
- 17 13. Hata J, Ninomiya T, Hirakawa Y, et al. Secular trends in cardiovascular disease and  
18 its risk factors in Japanese: half-century data from the Hisayama Study



- 1 (1961-2009). *Circulation* 2013;128:1198-205.
- 2 14. Quirynen M, Bollen CM. The influence of surface roughness and surface-free  
3 energy on supra- and subgingival plaque formation in man. A review of the  
4 literature. *J Clin Periodontol* 1995;22:1-14.
- 5 15. Moon JH, Koo BK, Moon MK. Optimal high-density lipoprotein cholesterol cutoff  
6 for predicting cardiovascular disease: Comparison of the Korean and US  
7 National Health and Nutrition Examination Surveys. *Journal of clinical  
8 lipidology* 2015;9:334-42.
- 9 16. American Diabetes Association. Standards of medical care in diabetes--2014.  
10 *Diabetes Care* 2014;37 Suppl 1:S14-80.
- 11 17. Alberti KG, Eckel RH, Grundy SM, et al. Harmonizing the metabolic syndrome: a  
12 joint interim statement of the International Diabetes Federation Task Force on  
13 Epidemiology and Prevention; National Heart, Lung, and Blood Institute;  
14 American Heart Association; World Heart Federation; International  
15 Atherosclerosis Society; and International Association for the Study of Obesity.  
16 *Circulation* 2009;120:1640-5.
- 17 18. Hong M, Kim HY, Seok H, et al. Prevalence and risk factors of periodontitis among  
18 adults with or without diabetes mellitus. *Korean J Intern Med* 2016;31:910-9.

- 1  
2  
3  
4  
5  
6 1 19. Lin DY, Psaty BM, Kronmal RA. Assessing the sensitivity of regression results to  
7  
8  
9 2 unmeasured confounders in observational studies. *Biometrics* 1998;54:948-63.  
10  
11 3 20. Takeshita T, Matsuo K, Furuta M, et al. Distinct composition of the oral indigenous  
12  
13  
14 4 microbiota in South Korean and Japanese adults. *Scientific reports* 2014;4:6990.  
15  
16  
17 5 21. Lee SI, Moon HY, Kwak JM, et al. Relationship between meat and cereal  
18  
19  
20 6 consumption and colorectal cancer in Korea and Japan. *J Gastroenterol Hepatol*  
21  
22  
23 7 2008;23:138-40.  
24  
25  
26 8 22. Lee WC, Lee MJ, Kim JS, et al. Foodborne illness outbreaks in Korea and Japan  
27  
28  
29 9 studied retrospectively. *J Food Prot* 2001;64:899-902.  
30  
31 10 23. Park J, Lee H-J. Shifts in Kimchi Consumption between 2005 and 2015 by Region  
32  
33  
34 11 and Income Level in the Korean Population: Korea National Health and  
35  
36  
37 12 Nutrition Examination Survey (2005, 2015). *Korean Journal of Community*  
38  
39  
40 13 *Nutrition* 2017;22:145-58.  
41  
42  
43 14 24. Japanese Ministry of Health Labour and Welfare. National Health and Nutrition  
44  
45 15 Survey 2018 [cited 2018, February 1. Available from:  
46  
47  
48 16 [http://www.mhlw.go.jp/bunya/kenkou/kenkou\\_eiyou\\_chousa.html](http://www.mhlw.go.jp/bunya/kenkou/kenkou_eiyou_chousa.html) accessed  
49  
50  
51 17 August 31 2017.  
52  
53  
54 18 25. Park KY, Jeong JK, Lee YE, et al. Health benefits of kimchi (Korean fermented  
55  
56  
57  
58  
59  
60

- 1  
2  
3  
4  
5  
6 1 vegetables) as a probiotic food. *Journal of medicinal food* 2014;17:6-20.  
7  
8  
9 2 26. Stamatova I, Meurman JH. Probiotics and periodontal disease. *Periodontol 2000*  
10  
11 3 2009;51:141-51.  
12  
13  
14 4 27. Kingman A, Albandar JM. Methodological aspects of epidemiological studies of  
15  
16  
17 5 periodontal diseases. *Periodontol 2000* 2002;29:11-30.  
18  
19  
20 6  
21  
22 7  
23  
24  
25  
26  
27  
28  
29  
30  
31  
32  
33  
34  
35  
36  
37  
38  
39  
40  
41  
42  
43  
44  
45  
46  
47  
48  
49  
50  
51  
52  
53  
54  
55  
56  
57  
58  
59  
60

Table 1. Demographic characteristics of Korean and Japanese participants aged 40–79 years

|                                                 | Korean<br>n=3574 | Japanese<br>n=2205 | P value |
|-------------------------------------------------|------------------|--------------------|---------|
| Age                                             | 58.4±11.0        | 60.5±10.7          | <0.001  |
| Age category                                    |                  |                    | <0.001  |
| 40-49                                           | 902 (25.2%)      | 434 (19.7%)        |         |
| 50-59                                           | 1009 (28.2%)     | 514 (23.3%)        |         |
| 60-69                                           | 936 (26.2%)      | 743 (33.7%)        |         |
| 70-79                                           | 727 (20.3%)      | 514 (23.3%)        |         |
| Sex                                             |                  |                    | 0.074   |
| Men                                             | 1527 (42.7%)     | 995 (45.1%)        |         |
| Women                                           | 2047 (57.3%)     | 1210 (54.9%)       |         |
| Job classification                              |                  |                    | <0.001  |
| Clerical support workers                        | 191 (5.3%)       | 526 (23.9%)        |         |
| Elementary occupations                          | 394 (11.0%)      | 128 (5.8%)         |         |
| Other jobs                                      | 1514 (42.4%)     | 389 (17.6%)        |         |
| Unemployed, homemakers and<br>part-time workers | 1475 (41.3%)     | 1162 (52.7%)       |         |

n (%), mean ± SD

 $\chi^2$  test for categorical variables and t-test for continuous variables

1

Table 2. Age-adjusted mean values and frequencies of dental and systemic parameters by country

|                                               | Korean          | Japanese        | P value |
|-----------------------------------------------|-----------------|-----------------|---------|
| Periodontal disease (CPI code $\geq 3$ )*     | 31.4%           | 42.1%           | <0.001  |
| Number of teeth                               | 22.9 $\pm$ 0.1  | 24.1 $\pm$ 0.1  | <0.001  |
| 0                                             | 2.0%            | 1.0%            |         |
| 1-9                                           | 4.6%            | 2.6%            |         |
| 10-19                                         | 8.5%            | 7.6%            |         |
| 20-27                                         | 39.9%           | 45.8%           |         |
| 28-                                           | 45.0%           | 42.9%           |         |
| Number of decayed teeth                       | 0.59 $\pm$ 0.02 | 0.59 $\pm$ 0.03 | 0.882   |
| Number of filled teeth                        | 7.0 $\pm$ 0.1   | 13.0 $\pm$ 0.2  | <0.001  |
| Dental visit in the last 12 months            | 25.6%           | 30.4%           | <0.001  |
| Current smoking                               | 18.6%           | 20.1%           | 0.485   |
| Job classification                            |                 |                 | <0.001  |
| Clerical support workers                      | 6.9%            | 31.9%           |         |
| Elementary occupations                        | 10.2%           | 6.3%            |         |
| Other jobs                                    | 46.6%           | 18.9%           |         |
| Unemployed, homemakers, and part-time workers | 36.3%           | 42.9%           |         |
| Diabetes                                      | 11.9%           | 9.4%            | 0.018   |
| Elevated waist circumference                  | 38.6%           | 39.2%           | 0.793   |
| Elevated fasting glucose                      | 36.2%           | 50.3%           | <0.001  |
| Elevated blood pressure                       | 46.7%           | 47.6%           | 0.046   |
| Elevated triglycerides                        | 39.8%           | 32.1%           | 0.001   |
| Reduced HDL                                   | 39.8%           | 8.6%            | <0.001  |
| MetS                                          | 36.2%           | 30.5%           | 0.001   |

Mean  $\pm$  SD

Differences in age-adjusted mean values and proportions were tested by linear regression modeling and logistic regression analysis

\* Participants who received periodontal examination and had more than 10 teeth (n = 3,217 in Korean and n = 2,067 in Japanese).

HDL, high-density lipoprotein; MetS, metabolic syndrome

Table 3. Adjusted odds ratio for periodontal disease according to country.

|                                                                        | Model 1          |         | Model 2          |         | Model 3          |         |
|------------------------------------------------------------------------|------------------|---------|------------------|---------|------------------|---------|
|                                                                        | OR (95% CI)      | P value | OR (95% CI)      | P value | OR (95% CI)      | P value |
| Country (ref. Korea)                                                   |                  |         |                  |         |                  |         |
| Japan                                                                  | 1.68 (1.41-2.00) | <0.001  | 1.67 (1.41-1.99) | <0.001  | 1.80 (1.50-2.16) | <0.001  |
| Diabetes (ref. no)                                                     |                  |         |                  |         |                  |         |
| Yes                                                                    | 1.47 (1.23-1.76) | <0.001  |                  |         |                  |         |
| MetS (ref. no)                                                         |                  |         |                  |         |                  |         |
| Yes                                                                    |                  |         | 1.20 (1.06-1.35) | 0.005   |                  |         |
| Individual MetS components                                             |                  |         |                  |         |                  |         |
| Waist (ref. normal)                                                    |                  |         |                  |         |                  |         |
| Elevated                                                               |                  |         |                  |         | 1.30 (1.14-1.48) | <0.001  |
| Fasting glucose (ref. normal)                                          |                  |         |                  |         |                  |         |
| Elevated                                                               |                  |         |                  |         | 1.00 (0.88-1.14) | 0.956   |
| Triglyceride (ref. normal)                                             |                  |         |                  |         |                  |         |
| Elevated                                                               |                  |         |                  |         | 1.06 (0.94-1.21) | 0.336   |
| HDL (ref. normal)                                                      |                  |         |                  |         |                  |         |
| Reduced                                                                |                  |         |                  |         | 1.01 (0.88-1.15) | 0.895   |
| Blood pressure (ref. normal)                                           |                  |         |                  |         |                  |         |
| Elevated                                                               |                  |         |                  |         | 1.27 (1.09-1.47) | 0.002   |
| Age                                                                    | 1.04 (1.03-1.04) | <0.001  | 1.04 (1.03-1.04) | <0.001  | 1.03 (1.03-1.04) | <0.001  |
| Sex (ref. men)                                                         |                  |         |                  |         |                  |         |
| Women                                                                  | 0.70 (0.62-0.80) | <0.001  | 0.68 (0.60-0.78) | <0.001  | 0.62 (0.54-0.72) | <0.001  |
| Number of teeth                                                        | 0.97 (0.96-0.99) | <0.001  | 0.97 (0.96-0.99) | <0.001  | 0.97 (0.96-0.99) | <0.001  |
| Number of decayed and filled teeth                                     | 1.01 (0.99-1.03) | 0.056   | 1.01 (0.99-1.03) | 0.055   | 1.01 (0.99-1.03) | 0.064   |
| Dental visit in the last 12 months (ref. yes)                          |                  |         |                  |         |                  |         |
| No                                                                     | 0.95 (0.83-1.08) | 0.401   | 0.94 (0.83-1.07) | 0.351   | 0.94 (0.83-1.07) | 0.392   |
| Current smoking (ref. no)                                              |                  |         |                  |         |                  |         |
| Yes                                                                    | 2.16 (1.83-2.55) | <0.001  | 2.14 (1.81-2.53) | <0.001  | 2.15 (1.82-2.55) | <0.001  |
| Job classification (ref. unemployed, homemakers and part-time workers) |                  |         |                  |         |                  |         |
| Clerical support workers                                               | 0.91 (0.74-1.12) | 0.375   | 0.90 (0.73-1.10) | 0.312   | 0.89 (0.73-1.09) | 0.262   |
| Elementary occupations                                                 | 1.25 (1.00-1.55) | 0.043   | 1.25 (1.00-1.55) | 0.044   | 1.25 (1.01-1.55) | 0.045   |
| Other jobs                                                             | 1.24 (1.06-1.44) | 0.005   | 1.23 (1.06-1.44) | 0.006   | 1.23 (1.05-1.43) | 0.007   |

Logistic regression analysis using periodontal disease as the dependent variable and country as the independent

1  
2  
3  
4  
5 variables.

6 Participants who received periodontal examination and had more than 10 teeth (n = 3,217 in Korean and n = 2,067  
7 in Japanese).

8 Diabetes, MetS, and individual MetS components were included in Models 1, 2, and 3, respectively.

9 All models were adjusted for age, sex, number of teeth, number of decayed and filled teeth, dental visit, current  
10 smoking, and occupation.

11 OR, odds ratio; CI, confidence interval; ref, reference; MetS, metabolic syndrome; HDL, high-density lipoprotein.

12  
13  
14  
15 1

16  
17 2  
18  
19  
20  
21  
22  
23  
24  
25  
26  
27  
28  
29  
30  
31  
32  
33  
34  
35  
36  
37  
38  
39  
40  
41  
42  
43  
44  
45  
46  
47  
48  
49  
50  
51  
52  
53  
54  
55  
56  
57  
58  
59  
60

Supplementary Table 1. Estimates for odds ratio of periodontal disease for Japanese compared to Koreans with adjustment for an unmeasured factors.

| OR* | P1‡  | P0†                     |                         |                         |                         |                  |                  |     |  |
|-----|------|-------------------------|-------------------------|-------------------------|-------------------------|------------------|------------------|-----|--|
|     |      |                         | 0.05                    | 0.1                     | 0.2                     | 0.3              | 0.5              | 0.8 |  |
| 1.8 | 0.05 | 1.68 (1.42-2.00)        | 1.75 (1.47-2.08)        | 1.88 (1.58-2.23)        | 2.01 (1.69-2.38)        | 2.27 (1.91-2.69) | 2.65 (2.23-3.15) |     |  |
|     | 0.1  | 1.62 (1.36-1.93)        | 1.68 (1.42-2.00)        | 1.81 (1.52-2.15)        | 1.93 (1.63-2.30)        | 2.18 (1.84-2.59) | 2.55 (2.15-3.04) |     |  |
|     | 0.2  | 1.51 (1.27-1.79)        | 1.57 (1.32-1.86)        | 1.68 (1.42-2.00)        | 1.80 (1.51-2.14)        | 2.03 (1.71-2.41) | 2.38 (2.00-2.83) |     |  |
|     | 0.3  | 1.41 (1.19-1.68)        | 1.47 (1.23-1.74)        | 1.57 (1.33-1.87)        | 1.68 (1.42-2.00)        | 1.90 (1.60-2.26) | 2.23 (1.87-2.64) |     |  |
|     | 0.5  | 1.25 (1.05-1.49)        | 1.30 (1.09-1.54)        | 1.39 (1.17-1.66)        | 1.49 (1.25, 1.77)       | 1.68 (1.42-2.00) | 1.97 (1.66-2.34) |     |  |
|     | 0.8  | <b>1.07 (0.90-1.27)</b> | <b>1.11 (0.93-1.32)</b> | 1.19 (1.00-1.41)        | 1.27 (1.07-1.51)        | 1.44 (1.21-1.71) | 1.68 (1.42-2.00) |     |  |
| 2.2 | 0.05 | 1.68 (1.42-2.00)        | 1.78 (1.50-2.11)        | 1.97 (1.66-2.34)        | 2.16 (1.82-2.57)        | 2.54 (2.14-3.02) | 3.11 (2.62-3.70) |     |  |
|     | 0.1  | 1.59 (1.34-1.89)        | 1.68 (1.42-2.00)        | 1.86 (1.57-2.21)        | 2.04 (1.72-2.43)        | 2.40 (2.02-2.86) | 2.94 (2.48-3.50) |     |  |
|     | 0.2  | 1.44 (1.21-1.71)        | 1.52 (1.28-1.81)        | 1.68 (1.42-2.00)        | 1.85 (1.55-2.19)        | 2.17 (1.83-2.58) | 2.66 (2.24-3.16) |     |  |
|     | 0.3  | 1.31 (1.10-1.56)        | 1.39 (1.17-1.65)        | 1.53 (1.29-1.82)        | 1.68 (1.42-2.00)        | 1.98 (1.67-2.35) | 2.42 (2.04-2.88) |     |  |
|     | 0.5  | <b>1.11 (0.94-1.32)</b> | <b>1.18 (0.99-1.40)</b> | 1.30 (1.10-1.55)        | 1.43 (1.20-1.70)        | 1.68 (1.42-2.00) | 2.06 (1.74-2.45) |     |  |
|     | 0.8  | <b>0.91 (0.77-1.08)</b> | <b>0.96 (0.81-1.14)</b> | <b>1.06 (0.90-1.26)</b> | <b>1.17 (0.98-1.39)</b> | 1.37 (1.16-1.63) | 1.68 (1.42-2.00) |     |  |

OR (95% CI)

OR were adjusted for diabetes, covariates, and an unmeasured factor having an OR of periodontal disease of 1.8 or 2.2.

Bold indicates that OR was not significant.

\*OR of periodontal disease comparing between participants with and without an unmeasured factor.

†Prevalence of an unmeasured factor in Koreans

‡Prevalence of an unmeasured factor in Japanese

OR, odds ratio; CI, confidence interval.



Supplementary Table 2. Regression coefficients for number of teeth according to country.

|                            | Model 1                         |         | Model 2                         |         | Model 3                         |         |
|----------------------------|---------------------------------|---------|---------------------------------|---------|---------------------------------|---------|
|                            | $\beta$ coefficient<br>(95% CI) | p value | $\beta$ coefficient<br>(95% CI) | p value | $\beta$ coefficient<br>(95% CI) | p value |
| Country                    |                                 |         |                                 |         |                                 |         |
| Korea                      |                                 |         |                                 |         |                                 |         |
| Japan                      | 0.19 (0.17; 0.21)               | <0.001  | 0.19 (0.17; 0.21)               | <0.001  | 0.19 (0.17; 0.22)               | <0.001  |
| Diabetes                   |                                 |         |                                 |         |                                 |         |
| No                         |                                 |         |                                 |         |                                 |         |
| Yes                        | -0.04 (-0.06; -0.02)            | <0.001  |                                 |         |                                 |         |
| MetS                       |                                 |         |                                 |         |                                 |         |
| No                         |                                 |         |                                 |         |                                 |         |
| Yes                        |                                 |         | -0.03 (-0.04; -0.01)            | <0.001  |                                 |         |
| Individual MetS components |                                 |         |                                 |         |                                 |         |
| Waist                      |                                 |         |                                 |         |                                 |         |
| Normal                     |                                 |         |                                 |         |                                 |         |
| Elevated                   |                                 |         |                                 |         | -0.006 (-0.019; 0.006)          | 0.314   |
| Fasting glucose            |                                 |         |                                 |         |                                 |         |
| Normal                     |                                 |         |                                 |         |                                 |         |
| Elevated                   |                                 |         |                                 |         | -0.007 (-0.019; 0.005)          | 0.248   |
| Triglyceride               |                                 |         |                                 |         |                                 |         |
| Normal                     |                                 |         |                                 |         |                                 |         |
| Elevated                   |                                 |         |                                 |         | -0.007 (-0.020; 0.005)          | 0.251   |
| HDL                        |                                 |         |                                 |         |                                 |         |
| Normal                     |                                 |         |                                 |         |                                 |         |
| Reduced                    |                                 |         |                                 |         | -0.007 (-0.019; 0.005)          | 0.237   |
| Blood pressure             |                                 |         |                                 |         |                                 |         |
| Normal                     |                                 |         |                                 |         |                                 |         |
| Elevated                   |                                 |         |                                 |         | -0.007 (-0.019; 0.004)          | 0.216   |

Participants who received periodontal examination (n = 3,428 in Korea and n = 2,153 in Japan).

Generalized linear models with a Poisson probability distribution using number of teeth as the dependent variable and country as the independent variables.

Diabetes, MetS, and individual MetS components were included in Model 1, 2, and 3, respectively.

All models were adjusted for age, sex, number of teeth, number of decayed and filled teeth, dental visit, current smoking, and job.

CI, confidence interval; MetS, metabolic syndrome; HDL, high density lipoprotein.

Supplementary Table 3. Adjusted odds ratio for periodontal disease stratified by number of teeth.

|                                                         | Model 1 |             | Model 2 |             |
|---------------------------------------------------------|---------|-------------|---------|-------------|
|                                                         | OR      | (95% CI)    | OR      | (95% CI)    |
| 10-19 teeth (n = 405 in Korea and n = 258 in Japan)     |         |             |         |             |
| Country                                                 |         |             |         |             |
| Korea                                                   | 1       |             | 1       |             |
| Japan                                                   | 2.53    | (1.69-3.78) | 2.51    | (1.68-3.75) |
| Diabetes                                                |         |             |         |             |
| No                                                      | 1       |             |         |             |
| Yes                                                     | 1.14    | (0.77-1.70) |         |             |
| MetS                                                    |         |             |         |             |
| No                                                      |         |             | 1       |             |
| Yes                                                     |         |             | 1.22    | (0.88-1.71) |
| 20-27 teeth (n = 1,463 in Korea and n = 1,089 in Japan) |         |             |         |             |
| Country                                                 |         |             |         |             |
| Korea                                                   | 1       |             | 1       |             |
| Japan                                                   | 1.58    | (1.20-2.07) | 1.57    | (1.20-2.06) |
| Diabetes                                                |         |             |         |             |
| No                                                      | 1       |             |         |             |
| Yes                                                     | 1.46    | (1.14-1.86) |         |             |
| MetS                                                    |         |             |         |             |
| No                                                      |         |             | 1       |             |
| Yes                                                     |         |             | 1.06    | (0.89-1.26) |
| ≥28 teeth (n = 1,349 in Korea and n = 720 in Japan)     |         |             |         |             |
| Country                                                 |         |             |         |             |
| Korea                                                   | 1       |             | 1       |             |
| Japan                                                   | 1.50    | (1.02-2.19) | 1.46    | (0.99-2.14) |
| Diabetes                                                |         |             |         |             |
| No                                                      | 1       |             |         |             |
| Yes                                                     | 1.78    | (1.26-2.52) |         |             |
| MetS                                                    |         |             |         |             |
| No                                                      |         |             | 1       |             |
| Yes                                                     |         |             | 1.33    | (1.07-1.67) |

Logistic regression analysis using periodontal disease as the dependent variable and country as the independent variables.

Diabetes and MetS were included in Model 1 and 2, respectively.

All models were adjusted for age, sex, number of teeth, number of decayed and filled teeth, dental visit, current smoking, and job.

OR, odds ratio; CI, confidence interval; KNHANES, Korean National Health and Nutrition Examination Survey; MetS, metabolic syndrome.

**STROBE 2007 (v4) Statement—Checklist of items that should be included in reports of *cross-sectional studies***

| Section/Topic                | Item # | Recommendation                                                                                                                                                                       | Reported on page # |
|------------------------------|--------|--------------------------------------------------------------------------------------------------------------------------------------------------------------------------------------|--------------------|
| <b>Title and abstract</b>    | 1      | (a) Indicate the study's design with a commonly used term in the title or the abstract                                                                                               | 3                  |
|                              |        | (b) Provide in the abstract an informative and balanced summary of what was done and what was found                                                                                  | 3-4                |
| <b>Introduction</b>          |        |                                                                                                                                                                                      |                    |
| Background/rationale         | 2      | Explain the scientific background and rationale for the investigation being reported                                                                                                 | 6-8                |
| Objectives                   | 3      | State specific objectives, including any prespecified hypotheses                                                                                                                     | 8                  |
| <b>Methods</b>               |        |                                                                                                                                                                                      |                    |
| Study design                 | 4      | Present key elements of study design early in the paper                                                                                                                              | 8-9                |
| Setting                      | 5      | Describe the setting, locations, and relevant dates, including periods of recruitment, exposure, follow-up, and data collection                                                      | 8-9                |
| Participants                 | 6      | (a) Give the eligibility criteria, and the sources and methods of selection of participants                                                                                          | 8-9                |
| Variables                    | 7      | Clearly define all outcomes, exposures, predictors, potential confounders, and effect modifiers. Give diagnostic criteria, if applicable                                             | 9-12               |
| Data sources/<br>measurement | 8*     | For each variable of interest, give sources of data and details of methods of assessment (measurement). Describe comparability of assessment methods if there is more than one group | 9-12               |
| Bias                         | 9      | Describe any efforts to address potential sources of bias                                                                                                                            | 13-14              |
| Study size                   | 10     | Explain how the study size was arrived at                                                                                                                                            | 8-9                |
| Quantitative variables       | 11     | Explain how quantitative variables were handled in the analyses. If applicable, describe which groupings were chosen and why                                                         | 12-13              |
| Statistical methods          | 12     | (a) Describe all statistical methods, including those used to control for confounding                                                                                                | 12-13              |
|                              |        | (b) Describe any methods used to examine subgroups and interactions                                                                                                                  |                    |
|                              |        | (c) Explain how missing data were addressed                                                                                                                                          | 8-9                |
|                              |        | (d) If applicable, describe analytical methods taking account of sampling strategy                                                                                                   |                    |
|                              |        | (e) Describe any sensitivity analyses                                                                                                                                                | 13                 |
| <b>Results</b>               |        |                                                                                                                                                                                      |                    |

|                          |     |                                                                                                                                                                                                              |       |
|--------------------------|-----|--------------------------------------------------------------------------------------------------------------------------------------------------------------------------------------------------------------|-------|
| Participants             | 13* | (a) Report numbers of individuals at each stage of study—eg numbers potentially eligible, examined for eligibility, confirmed eligible, included in the study, completing follow-up, and analysed            | 8-9   |
|                          |     | (b) Give reasons for non-participation at each stage                                                                                                                                                         | 8-9   |
|                          |     | (c) Consider use of a flow diagram                                                                                                                                                                           |       |
| Descriptive data         | 14* | (a) Give characteristics of study participants (eg demographic, clinical, social) and information on exposures and potential confounders                                                                     | 13    |
|                          |     | (b) Indicate number of participants with missing data for each variable of interest                                                                                                                          | 8-9   |
| Outcome data             | 15* | Report numbers of outcome events or summary measures                                                                                                                                                         | 13    |
| Main results             | 16  | (a) Give unadjusted estimates and, if applicable, confounder-adjusted estimates and their precision (eg, 95% confidence interval). Make clear which confounders were adjusted for and why they were included | 13    |
|                          |     | (b) Report category boundaries when continuous variables were categorized                                                                                                                                    |       |
|                          |     | (c) If relevant, consider translating estimates of relative risk into absolute risk for a meaningful time period                                                                                             |       |
| Other analyses           | 17  | Report other analyses done—eg analyses of subgroups and interactions, and sensitivity analyses                                                                                                               | 14-15 |
| <b>Discussion</b>        |     |                                                                                                                                                                                                              |       |
| Key results              | 18  | Summarise key results with reference to study objectives                                                                                                                                                     | 14    |
| Limitations              | 19  | Discuss limitations of the study, taking into account sources of potential bias or imprecision. Discuss both direction and magnitude of any potential bias                                                   | 18-19 |
| Interpretation           | 20  | Give a cautious overall interpretation of results considering objectives, limitations, multiplicity of analyses, results from similar studies, and other relevant evidence                                   | 18-19 |
| Generalisability         | 21  | Discuss the generalisability (external validity) of the study results                                                                                                                                        | 18    |
| <b>Other information</b> |     |                                                                                                                                                                                                              |       |
| Funding                  | 22  | Give the source of funding and the role of the funders for the present study and, if applicable, for the original study on which the present article is based                                                | 20    |

\*Give information separately for cases and controls in case-control studies and, if applicable, for exposed and unexposed groups in cohort and cross-sectional studies.

**Note:** An Explanation and Elaboration article discusses each checklist item and gives methodological background and published examples of transparent reporting. The STROBE checklist is best used in conjunction with this article (freely available on the Web sites of PLoS Medicine at <http://www.plosmedicine.org/>, Annals of Internal Medicine at <http://www.annals.org/>, and Epidemiology at <http://www.epidem.com/>). Information on the STROBE Initiative is available at [www.strobe-statement.org](http://www.strobe-statement.org).
