# Supplementary material for: Comparison of the periodontal condition in Korean and Japanese adults: a cross-sectional study
Source: PubMed Central journal article supplement — BMJ Open. 2018 Dec 2;8(11):bmjopen-2018-024332. doi: 10.1136/bmjopen-2018-024332 (PMC6278802; doi:10.1136/bmjopen-2018-024332), 2018-12-02
Supplement: bmjopen-2018-024332supp001.pdf [file bmjopen-2018-024332supp001.pdf]

Supplementary Table 1. Estimates for odds ratio of periodontal disease for Japanese compared to Koreans with adjustment for an unmeasured factors.

| OR* | P1‡  | P0†                     | 0.05                    | 0.1                     | 0.2                     | 0.3              | 0.5              | 0.8              |
|-----|------|-------------------------|-------------------------|-------------------------|-------------------------|------------------|------------------|------------------|
|     |      |                         | 1.8                     | 0.05                    | 1.68 (1.42-2.00)        | 1.75 (1.47-2.08) | 1.88 (1.58-2.23) | 2.01 (1.69-2.38) |
|     | 0.1  | 1.62 (1.36-1.93)        | 1.68 (1.42-2.00)        | 1.81 (1.52-2.15)        | 1.93 (1.63-2.30)        | 2.18 (1.84-2.59) | 2.55 (2.15-3.04) |                  |
|     | 0.2  | 1.51 (1.27-1.79)        | 1.57 (1.32-1.86)        | 1.68 (1.42-2.00)        | 1.80 (1.51-2.14)        | 2.03 (1.71-2.41) | 2.38 (2.00-2.83) |                  |
|     | 0.3  | 1.41 (1.19-1.68)        | 1.47 (1.23-1.74)        | 1.57 (1.33-1.87)        | 1.68 (1.42-2.00)        | 1.90 (1.60-2.26) | 2.23 (1.87-2.64) |                  |
|     | 0.5  | 1.25 (1.05-1.49)        | 1.30 (1.09-1.54)        | 1.39 (1.17-1.66)        | 1.49 (1.25, 1.77)       | 1.68 (1.42-2.00) | 1.97 (1.66-2.34) |                  |
|     | 0.8  | <b>1.07 (0.90-1.27)</b> | <b>1.11 (0.93-1.32)</b> | 1.19 (1.00-1.41)        | 1.27 (1.07-1.51)        | 1.44 (1.21-1.71) | 1.68 (1.42-2.00) |                  |
| 2.2 | 0.05 | 1.68 (1.42-2.00)        | 1.78 (1.50-2.11)        | 1.97 (1.66-2.34)        | 2.16 (1.82-2.57)        | 2.54 (2.14-3.02) | 3.11 (2.62-3.70) |                  |
|     | 0.1  | 1.59 (1.34-1.89)        | 1.68 (1.42-2.00)        | 1.86 (1.57-2.21)        | 2.04 (1.72-2.43)        | 2.40 (2.02-2.86) | 2.94 (2.48-3.50) |                  |
|     | 0.2  | 1.44 (1.21-1.71)        | 1.52 (1.28-1.81)        | 1.68 (1.42-2.00)        | 1.85 (1.55-2.19)        | 2.17 (1.83-2.58) | 2.66 (2.24-3.16) |                  |
|     | 0.3  | 1.31 (1.10-1.56)        | 1.39 (1.17-1.65)        | 1.53 (1.29-1.82)        | 1.68 (1.42-2.00)        | 1.98 (1.67-2.35) | 2.42 (2.04-2.88) |                  |
|     | 0.5  | <b>1.11 (0.94-1.32)</b> | <b>1.18 (0.99-1.40)</b> | 1.30 (1.10-1.55)        | 1.43 (1.20-1.70)        | 1.68 (1.42-2.00) | 2.06 (1.74-2.45) |                  |
|     | 0.8  | <b>0.91 (0.77-1.08)</b> | <b>0.96 (0.81-1.14)</b> | <b>1.06 (0.90-1.26)</b> | <b>1.17 (0.98-1.39)</b> | 1.37 (1.16-1.63) | 1.68 (1.42-2.00) |                  |

OR (95%CI)

OR were adjusted for diabetes, covariates, and an unmeasured factor having an OR of periodontal disease of 1.8 or 2.2.

Bold indicates that OR was not significant.

\*OR of periodontal disease comparing between participants with and without an unmeasured factor.

†Prevalence of an unmeasured factor in Koreans

‡Prevalence of an unmeasured factor in Japanese

OR, odds ratio; CI, confidence interval.

Supplementary Table 2. Regression coefficients for number of teeth according to country.

|                            | Model 1                         |         | Model 2                         |         | Model 3                         |         |
|----------------------------|---------------------------------|---------|---------------------------------|---------|---------------------------------|---------|
|                            | $\beta$ coefficient<br>(95% CI) | p value | $\beta$ coefficient<br>(95% CI) | p value | $\beta$ coefficient<br>(95% CI) | p value |
| Country                    |                                 |         |                                 |         |                                 |         |
| Korea                      |                                 |         |                                 |         |                                 |         |
| Japan                      | 0.19 (0.17; 0.21)               | <0.001  | 0.19 (0.17; 0.21)               | <0.001  | 0.19 (0.17; 0.22)               | <0.001  |
| Diabetes                   |                                 |         |                                 |         |                                 |         |
| No                         |                                 |         |                                 |         |                                 |         |
| Yes                        | -0.04 (-0.06; -0.02)            | <0.001  |                                 |         |                                 |         |
| MetS                       |                                 |         |                                 |         |                                 |         |
| No                         |                                 |         |                                 |         |                                 |         |
| Yes                        |                                 |         | -0.03 (-0.04; -0.01)            | <0.001  |                                 |         |
| Individual MetS components |                                 |         |                                 |         |                                 |         |
| Waist                      |                                 |         |                                 |         |                                 |         |
| Normal                     |                                 |         |                                 |         |                                 |         |
| Elevated                   |                                 |         |                                 |         | -0.006 (-0.019; 0.006)          | 0.314   |
| Fasting glucose            |                                 |         |                                 |         |                                 |         |
| Normal                     |                                 |         |                                 |         |                                 |         |
| Elevated                   |                                 |         |                                 |         | -0.007 (-0.019; 0.005)          | 0.248   |
| Triglyceride               |                                 |         |                                 |         |                                 |         |
| Normal                     |                                 |         |                                 |         |                                 |         |
| Elevated                   |                                 |         |                                 |         | -0.007 (-0.020; 0.005)          | 0.251   |
| HDL                        |                                 |         |                                 |         |                                 |         |
| Normal                     |                                 |         |                                 |         |                                 |         |
| Reduced                    |                                 |         |                                 |         | -0.007 (-0.019; 0.005)          | 0.237   |
| Blood pressure             |                                 |         |                                 |         |                                 |         |
| Normal                     |                                 |         |                                 |         |                                 |         |
| Elevated                   |                                 |         |                                 |         | -0.007 (-0.019; 0.004)          | 0.216   |

Participants who received periodontal examination (n = 3,428 in Korea and n = 2,153 in Japan).

Generalized linear models with a Poisson probability distribution using number of teeth as the dependent variable and country as the independent variables.

Diabetes, MetS, and individual MetS components were included in Model 1, 2, and 3, respectively.

All models were adjusted for age, sex, number of teeth, number of decayed and filled teeth, dental visit, current smoking, and job.

CI, confidence interval; MetS, metabolic syndrome; HDL, high density lipoprotein.

Supplementary Table 3. Adjusted odds ratio for periodontal disease stratified by number of teeth.

|                                                         | Model 1 |             | Model 2 |             |
|---------------------------------------------------------|---------|-------------|---------|-------------|
|                                                         | OR      | (95% CI)    | OR      | (95% CI)    |
| 10-19 teeth (n = 405 in Korea and n = 258 in Japan)     |         |             |         |             |
| Country                                                 |         |             |         |             |
| Korea                                                   | 1       |             | 1       |             |
| Japan                                                   | 2.53    | (1.69-3.78) | 2.51    | (1.68-3.75) |
| Diabetes                                                |         |             |         |             |
| No                                                      | 1       |             |         |             |
| Yes                                                     | 1.14    | (0.77-1.70) |         |             |
| MetS                                                    |         |             |         |             |
| No                                                      |         |             | 1       |             |
| Yes                                                     |         |             | 1.22    | (0.88-1.71) |
| 20-27 teeth (n = 1,463 in Korea and n = 1,089 in Japan) |         |             |         |             |
| Country                                                 |         |             |         |             |
| Korea                                                   | 1       |             | 1       |             |
| Japan                                                   | 1.58    | (1.20-2.07) | 1.57    | (1.20-2.06) |
| Diabetes                                                |         |             |         |             |
| No                                                      | 1       |             |         |             |
| Yes                                                     | 1.46    | (1.14-1.86) |         |             |
| MetS                                                    |         |             |         |             |
| No                                                      |         |             | 1       |             |
| Yes                                                     |         |             | 1.06    | (0.89-1.26) |
| ≥28 teeth (n = 1,349 in Korea and n = 720 in Japan)     |         |             |         |             |
| Country                                                 |         |             |         |             |
| Korea                                                   | 1       |             | 1       |             |
| Japan                                                   | 1.50    | (1.02-2.19) | 1.46    | (0.99-2.14) |
| Diabetes                                                |         |             |         |             |
| No                                                      | 1       |             |         |             |
| Yes                                                     | 1.78    | (1.26-2.52) |         |             |
| MetS                                                    |         |             |         |             |
| No                                                      |         |             | 1       |             |
| Yes                                                     |         |             | 1.33    | (1.07-1.67) |

Logistic regression analysis using periodontal disease as the dependent variable and country as the independent variables.

Diabetes and MetS were included in Model 1 and 2, respectively.

All models were adjusted for age, sex, number of teeth, number of decayed and filled teeth, dental visit, current smoking, and job.

OR, odds ratio; CI, confidence interval; KNHANES, Korean National Health and Nutrition Examination Survey; MetS, metabolic syndrome.
